1 **Specific hypersensitive response-associated recognition of new apoplastic effectors from**  
2 ***Cladosporium fulvum* in wild tomato**

3

4 **Carl H. Mesarich,<sup>1,2,3</sup> Bilal Ökmen,<sup>1,a</sup> Hanna Rovenich,<sup>1,a</sup> Scott A. Griffiths,<sup>1</sup> Changchun**  
5 **Wang,<sup>1,4</sup> Mansoor Karimi Jashni,<sup>1,5</sup> Aleksandar Mihajlovski,<sup>1,b</sup> Jérôme Collemare,<sup>1,c</sup>**  
6 **Lukas Hunziker,<sup>3,6</sup> Cecilia H. Deng,<sup>7</sup> Ate van der Burgt,<sup>1,d</sup> Henriek G. Beenen,<sup>1,d</sup>**  
7 **Matthew D. Templeton,<sup>3,7</sup> Rosie E. Bradshaw<sup>3,6</sup> and Pierre J.G.M. de Wit<sup>1,8</sup>**

8

9 <sup>1</sup>Laboratory of Phytopathology, Wageningen University, Droevendaalsesteeg 1, 6708 PB  
10 Wageningen, the Netherlands; <sup>2</sup>Laboratory of Molecular Plant Pathology, Institute of  
11 Agriculture & Environment, Massey University, Private Bag 11222, Palmerston North 4442,  
12 New Zealand; <sup>3</sup>Bio-Protection Research Centre, New Zealand; <sup>4</sup>College of Chemistry and  
13 Life Sciences, Zhejiang Normal University, Jinhua, Zhejiang 321004, People's Republic of  
14 China; <sup>5</sup>Department of Plant Pathology, Iranian Research Institute of Plant Protection,  
15 Agricultural Research, Education and Extension Organization, P.O. Box 19395–1454,  
16 Tehran, Iran; <sup>6</sup>Institute of Fundamental Sciences, Massey University, Private Bag 11222,  
17 Palmerston North 4442, New Zealand; <sup>7</sup>Breeding & Genomics/Bioprotection Portfolio, the  
18 New Zealand Institute for Plant & Food Research Limited, Mount Albert Research Centre,  
19 Auckland 1025, New Zealand; <sup>8</sup>Centre for BioSystems Genomics, P.O. Box 98, 6700 AB  
20 Wageningen, the Netherlands.

21

22 Present addresses: <sup>a</sup>Botanical Institute and Cluster of Excellence on Plant Sciences,  
23 University of Cologne, 50674 Cologne, Germany; <sup>b</sup>Food and Agriculture Organization of the  
24 United Nations, Viale delle Terme di Caracalla, 00153 Rome, Italy; <sup>c</sup>UMR1345 IRHS-INRA,  
25 42 rue Georges Morel, 49071 Beaucozé Cedex, France; <sup>d</sup>DuPont Industrial Biosciences  
26 Wageningen, Nieuwe Kanaal 7-S, 6709 PA Wageningen, the Netherlands.

27

28 Corresponding author:

29 Carl H. Mesarich

30 E-mail: [c.mesarich@massey.ac.nz](mailto:c.mesarich@massey.ac.nz)

31

32

33

34

## 35 **ABSTRACT**

36 Tomato leaf mould disease is caused by the biotrophic fungus *Cladosporium fulvum*. During  
37 infection, *C. fulvum* produces extracellular small secreted protein (SSP) effectors that  
38 function to promote colonization of the leaf apoplast. Resistance to the disease is governed by  
39 *Cf* immune receptor genes that encode receptor-like proteins (RLPs). These RLPs recognize  
40 specific SSP effectors to initiate a hypersensitive response (HR) that renders the pathogen  
41 avirulent. *C. fulvum* strains capable of overcoming one or more of all cloned *Cf* genes have  
42 now emerged. To combat these strains, new *Cf* genes are required. An effectormics  
43 approach was employed to identify wild tomato accessions carrying new *Cf* genes.  
44 Proteomics and transcriptome sequencing were first used to identify 70 apoplastic *in planta*-  
45 induced *C. fulvum* SSPs. Based on sequence homology, 61 of these SSPs were novel or  
46 lacked known functional domains. Seven, however, had predicted structural homology to  
47 antimicrobial proteins, suggesting a possible role in mediating antagonistic microbe–microbe  
48 interactions *in planta*. Wild tomato accessions were then screened for HR-associated  
49 recognition of 41 SSPs using the *Potato virus X*-based transient expression system. Nine  
50 SSPs were recognized by one or more accessions, suggesting that these plants carry new *Cf*  
51 genes available for incorporation into cultivated tomato.

52

## 53 **KEYWORDS**

54 Effectormics, *Cf* immune receptor genes, apoplastic effectors, antimicrobial proteins,  
55 *Cladosporium fulvum*, *Solanum lycopersicum* (tomato)

56

## 57 **INTRODUCTION**

58 Leaf mould disease of tomato (*Solanum lycopersicum*) is caused by the biotrophic  
59 Dothideomycete fungal pathogen *Cladosporium fulvum* (syn. *Passalora fulva* and *Fulvia*  
60 *fulva*) (Thomma et al., 2005). The fungus likely originated in South America, the centre of  
61 origin for tomato (Jenkins, 1948), with the first disease outbreak reported in South Carolina,  
62 USA, during the late 1800s (Cooke, 1883). *C. fulvum* now occurs worldwide, but is primarily  
63 a problem in greenhouse and high-tunnel environments, where tomato plants are exposed to  
64 both moderate temperatures and high relative humidity. Disease symptoms are typified by  
65 pale green to yellow spots on the adaxial leaf surface, as well as white to olive-green patches  
66 of mould on the abaxial leaf surface that turn brown upon sporulation. In the late stages of  
67 disease development, this sporulation is often associated with leaf wilting and partial  
68 defoliation, which, in severe infections, can cause death of the plant (Thomma et al., 2005).

69 During infection (i.e. in a compatible interaction), *C. fulvum* exclusively colonizes the  
70 tomato leaf apoplast, where it grows in close contact with surrounding mesophyll cells  
71 (Thomma et al., 2005). This colonization is promoted through a collection of virulence  
72 factors, termed effector proteins, which the fungus secretes into the apoplastic environment  
73 (e.g. Laugé et al., 1997). To date, 13 *C. fulvum* effectors have been identified, and the genes  
74 encoding these proteins have been cloned (Bolton et al., 2008; Joosten et al., 1994; Laugé et  
75 al., 2000; Luderer et al., 2002a; Mesarich et al., 2014; Ökmen et al., 2013; Stergiopoulos et  
76 al., 2012; van den Ackerveken et al., 1993; van Kan et al., 1991; Westerink et al., 2004). The  
77 majority (11 of 13) are small secreted proteins (SSPs) of less than 300 amino acid residues in  
78 length with: (i) an amino (N)-terminal signal peptide for secretion into the tomato leaf  
79 apoplast; and (ii) four or more cysteine (Cys) residues following their signal peptide cleavage  
80 site. An intrinsic virulence function has been determined for three of the 11 SSP effectors.  
81 The first of these, Avr2, which lacks a known functional domain, targets and inhibits at least  
82 four Cys proteases of tomato (Rcr3, Pip1, aleurain and TDI-65) to prevent the degradation of  
83 *C. fulvum* proteins (Krüger et al., 2002; Rooney et al., 2005; Shabab et al., 2008; van Esse et  
84 al., 2008). The second, Avr4, possesses a carbohydrate-binding module family domain  
85 (CBM\_14; PF01607) that binds chitin present in the cell wall of *C. fulvum* to protect against  
86 hydrolysis by basic plant chitinases (van den Burg et al., 2004, 2006; van Esse et al., 2007).  
87 The third, Ecp6, possesses three lysin motif domains (LysM; PF01476) that function to  
88 perturb chitin-triggered immunity (Bolton et al., 2008; de Jonge et al., 2010; Sánchez-Vallet  
89 et al., 2013). More specifically, two of the LysM domains cooperate to sequester chitin  
90 fragments released from the cell wall of invading hyphae, and in doing so, outcompete host  
91 chitin immune receptors for the binding of chitin fragments (Sánchez-Vallet et al., 2013). The  
92 third LysM domain has been proposed to perturb chitin-triggered immunity through  
93 interference with the host chitin immune receptor complex (Sánchez-Vallet et al., 2013).

94 Despite their roles in virulence, the same effectors can also be an Achilles' heel for  
95 *C. fulvum*. In particular accessions of tomato, these effectors or their modulated targets can be  
96 directly or indirectly recognized, respectively, as invasion patterns (IPs) by corresponding Cf  
97 immune receptors to trigger immune responses that render the pathogen avirulent (Cook et  
98 al., 2015; de Wit et al., 2009; Wulff et al., 2009b). In these incompatible interactions, the  
99 main output of the immune system is the hypersensitive response (HR), a localized form of  
100 cell death that arrests growth of the pathogen at the infection site (Heath, 2000). So far, 10 of  
101 the 11 *C. fulvum* SSP effectors, specifically Avr2, Avr4, Avr4E, Avr5, Avr9, Ecp1, Ecp2-1,  
102 Ecp4, Ecp5 and Ecp6, are known to be recognized as IPs in tomato accessions with the

103 corresponding Cf immune receptors Cf-2.1/Cf-2.2, Cf-4, Cf-4E, Cf-5, Cf-9, Cf-Ecp1,  
104 Cf-Ecp2-1, Cf-Ecp4, Cf-Ecp5 and Cf-Ecp6, respectively (de Wit et al., 2009; Thomma et al.,  
105 2011). All Cf immune receptor genes cloned to date encode receptor-like protein (RLP) cell  
106 surface receptors that possess extracytoplasmic leucine-rich repeats (eLRRs), a  
107 transmembrane domain, and a short cytoplasmic tail (Dixon et al., 1996, 1998; Jones et al.,  
108 1994; Panter et al., 2002; Takken et al., 1999; Thomas et al., 1997). Several studies suggest  
109 that the eLRRs are responsible for the direct or indirect recognition of *C. fulvum* effector  
110 proteins in the tomato leaf apoplast (Seear and Dixon, 2003; van der Hoorn et al., 2001a;  
111 Wulff et al., 2001, 2009a).

112 It was determined early on that wild *Solanum* species and landraces are a rich source  
113 of resistance against *C. fulvum*. Indeed, all cloned Cf immune receptor genes are derived from  
114 wild *Solanum* species or landraces, with Cf-2.1/Cf-2.2, Cf-9/Cf-9DC and Cf-9B from  
115 *Solanum pimpinellifolium* (Dixon et al., 1996; Jones et al., 1994; Panter et al., 2002; van der  
116 Hoorn et al., 2001b), Cf-4 and Cf-4E from *Solanum habrochaites* (Takken et al., 1999;  
117 Thomas et al., 1997), and Cf-5 from the landrace *Solanum lycopersicum* var. *cerasiforme*  
118 (Dixon et al., 1998). Based on this knowledge, Cf immune receptor genes were introgressed  
119 from wild *Solanum* species and landraces into cultivated tomato by breeders over several  
120 decades (Kerr and Bailey, 1964 and references therein). While largely effective, intensive  
121 year-round cultivation of these plants has led to the emergence of natural *C. fulvum* strains  
122 capable of overcoming one or more of all cloned Cf immune receptor genes (Hubbeling,  
123 1978; Iida et al., 2015; Laterrot, 1986; Li et al., 2015). Several types of sequence  
124 modification have been shown to occur in IP effector genes that permit the evasion of Cf  
125 immune receptor-mediated resistance by *C. fulvum*. These are: (i) gene deletion; (ii) the  
126 insertion of a transposon-like element (gene disruption); (iii) single nucleotide  
127 polymorphisms (SNPs) that result in non-synonymous amino acid substitutions; and (iv)  
128 nucleotide insertions or deletions (indels) that result in frame-shift mutations (Stergiopoulos  
129 et al., 2007). To combat strains capable of overcoming existing resistance specificities, new  
130 Cf immune receptor genes need to be identified for incorporation into cultivated tomato.

131 Laugé et al. (2000) hypothesized that “any stable, extracellular protein produced by a  
132 pathogen during colonization is a potential avirulence factor [IP]”. With this in mind, and  
133 given that all cloned Cf immune receptor genes encode an RLP, we set out to identify wild  
134 tomato accessions carrying new Cf immune receptor genes corresponding to apoplastic *in*  
135 *planta*-induced SSPs (ipiSSPs) of *C. fulvum* using effectoromics. Effectoromics is a powerful  
136 high-throughput functional genomics approach that uses effectors or effector candidates to

137 probe plant germplasm collections for corresponding immune receptors (Domazakis et al.,  
138 2017; Du and Vleeshouwers, 2014; Vleeshouwers and Oliver, 2014). Notably, this approach,  
139 which is based on the HR-associated recognition of effectors or effector candidates, has  
140 already proven to be successful for the identification of wild accessions and breeding lines of  
141 *Solanum* carrying *Cf* immune receptor genes corresponding to known effectors of *C. fulvum*.  
142 In a pioneering study by Laugé et al. (1998), 21 *S. lycopersicum* lines originating from early  
143 *C. fulvum* resistance breeding programmes were screened for their ability to recognize  
144 Ecp2-1 using the *Potato virus X* (PVX)-based transient expression system (Hammond-  
145 Kosack et al., 1995; Takken et al., 2000), as well as by leaf injection with purified Ecp2-1  
146 protein. Four lines, which have the same *S. pimpinellifolium* ancestor, recognized Ecp2-1,  
147 indicating for the first time that tomato carries an immune receptor gene corresponding to this  
148 effector (*Cf-Ecp2-1*) (Laugé et al., 1998).

149 In a follow-up study by Laugé et al. (2000), 28 *S. lycopersicum* breeding lines, many  
150 of which also have an *S. pimpinellifolium* ancestor, were screened for their ability to  
151 recognize purified Ecp1, Ecp2-1, Ecp3 (amino acid sequence not yet known), Ecp4 or Ecp5  
152 protein. Four lines recognized Ecp2-1, while two different lines recognized Ecp3 and Ecp5,  
153 respectively (Laugé et al., 2000). In the same study, a collection of 40 different  
154 *S. pimpinellifolium* accessions were also screened for their ability to recognize the same five  
155 effectors, as well as Avr4 and Avr9, using the PVX-based transient expression system. Three  
156 different accessions recognized Ecp1, Ecp2-1 and Ecp3 (purified protein), respectively, while  
157 two recognized Ecp4, three recognized Ecp5, and six recognized Avr9 (Laugé et al., 2000).  
158 Again, this study indicated for the first time that tomato carries immune receptor genes  
159 corresponding to Ecp3 (*Cf-Ecp3*), Ecp4 (*Cf-Ecp4*) and Ecp5 (*Cf-Ecp5*) (Laugé et al., 2000).  
160 Three known *C. fulvum* effectors have since been shown to be recognized by wild tomato  
161 accessions through infiltration of purified protein, specifically Ecp6 in *S. lycopersicum*  
162 (Thomma et al., 2011), as well as Avr4 and Avr9 in *S. pimpinellifolium* (Kruijt et al., 2005;  
163 van der Hoorn et al., 2001b).

164 As a starting point for our effectoromics approach, we used proteomics and  
165 transcriptome sequencing to identify 70 apoplastic ipiSSPs of *C. fulvum*. This set of 70 is  
166 made up of all 11 known SSP effectors of this fungus, as well as 59 *C. fulvum* candidate  
167 effectors (CfCEs). We screened 41 of these ipiSSPs for HR-associated recognition by wild  
168 tomato accessions using the PVX-based transient expression system. A total of nine ipiSSPs,  
169 renamed as extracellular proteins (Ecps), were recognized by one or more of 14 wild tomato

170 accessions, suggesting that these plants carry new *Cf* immune receptor genes available for  
171 incorporation into cultivated tomato.

172

## 173 RESULTS

### 174 Proteomics and transcriptome sequencing identify 70 apoplastic ipiSSPs of *C. fulvum*.

175 Liquid-chromatography–tandem mass spectrometry (LC–MS/MS) was used to identify  
176 fungal peptides corresponding to SSPs present in intercellular washing fluid (IWF) samples  
177 of compatible *C. fulvum*–tomato (*S. lycopersicum* cv. Heinz [H]-Cf-0) interactions. Here,  
178 SSPs are defined as those proteins of less than 300 amino acid residues in length with a  
179 predicted N-terminal signal peptide, but without a predicted glycosylphosphatidylinositol (GPI)  
180 anchor modification site, one or more transmembrane domains, a carboxyl (C)-terminal  
181 endoplasmic reticulum (ER) retention (H/KDEL)/retention-like (XXEL) signal, or sequence  
182 homology to enzymes. Using this approach, 297 unique fungal peptides were mapped to 75  
183 SSPs of *C. fulvum* (Table S1 and Information S1). Based on pre-existing RNA-Seq  
184 transcriptome sequencing data from a compatible *C. fulvum* strain 0WU–*S. lycopersicum* cv.  
185 H-Cf-0 interaction at 4, 8 and 12 d post-inoculation (dpi), as well as from *C. fulvum* strain  
186 0WU grown *in vitro* in potato-dextrose broth (PDB) or Gamborg B5 liquid media at 4 dpi  
187 (Mesarich et al., 2014), 70 of the 75 apoplastic SSPs (~93.3%) were deemed to be encoded  
188 by *in planta*-induced genes (Tables 1 and S1).

189 Amongst the 70 apoplastic ipiSSPs are all *C. fulvum* SSP effectors identified in  
190 previous studies (Avr2, Avr4, Avr4E, Avr5, Avr9, Ecp1, Ecp2-1, Ecp4, Ecp5, Ecp6 and  
191 Ecp7) (Bolton et al., 2008; Joosten et al., 1994; Laugé et al., 2000; Luderer et al., 2002a;  
192 Mesarich et al., 2014; van den Ackerveken et al., 1993; van Kan et al., 1991; Westerink et al.,  
193 2004), as well as 32 of 43 (~74.4%) *C. fulvum* candidate effectors (CfCEs) recently  
194 discovered using a combined bioinformatic and transcriptome sequencing approach  
195 (Mesarich et al., 2014) (Table S1). The latter includes CfPhiA-1 (CfCE11), a phialide protein  
196 previously identified in the IWF sample of a compatible *C. fulvum* (strain IPO 1979)–tomato  
197 (*S. lycopersicum* cv. Moneymaker [MM]-Cf-0) interaction at 14 dpi (Bolton et al., 2008).

198 Strikingly, 62 of the 70 apoplastic ipiSSPs (~88.6%) are both Cys-rich ( $\geq 4$  Cys  
199 residues) and have an even number of Cys residues (Tables 1 and S1). With the exception of  
200 putative propeptide kexin protease cleavage (LXKR) and N-linked glycosylation (NXS/T)  
201 sites, no shared motifs were identified between five or more of the 70 ipiSSPs. In total, six  
202 ipiSSPs, specifically CfCE16, CfCE20, CfCE33, CfCE40, CfCE66 and CfCE72, possess an  
203 LXKR motif (Information S1). In all but one of these ipiSSPs (CfCE72), this motif is located

204 between the predicted signal peptide cleavage site and the first Cys residue (Information S1).  
205 A similar motif (LXPR) is located between the predicted signal peptide cleavage site and the  
206 first Cys residue of CfCE33 and CfCE67 (Information S1). Twenty-five mature ipiSSPs  
207 (~35.7%) possess one or more NXS/T motifs (Information S1).

208 Basic local alignment search tool (BLAST) homology searches against publicly  
209 available sequence databases at the National Center for Biotechnology Information (NCBI)  
210 and the Joint Genome Institute (JGI) revealed that 14 of the 70 apoplasmic ipiSSPs are novel  
211 (20%), while 47 (~67.1%) have homology to proteins of unknown function (Tables 1 and  
212 S1). The nine remaining ipiSSPs (~12.9%) have known or predicted functional domains, or  
213 have homology to proteins with characterized biological functions. These are: Avr4  
214 (CBM\_14 domain; PF01607); Ecp2-1 (Hce2 domain; PF14856); Ecp6 (three LysM domains;  
215 PF01476); CfPhiA-1 and CfPhiA-2 (phialide proteins); CfCE55 (class II hydrophobin  
216 [Fig. 1]); CfCE60 (GPI-anchored superfamily domain; PF10342); CfCE61 (cerato-platanin  
217 protein; PF07249); and CfCE69 (hydrophobic surface-binding protein A [HsbA] domain;  
218 PF12296) (Tables 1 and S1). BLASTp homology searches and Cys spacing comparisons also  
219 revealed that 23 ipiSSPs are related to each other at the amino acid level. These are: Avr9 and  
220 CfCE67; CfCE4 and CfCE16; CfCE5, CfCE25 and CfCE65; CfCE9 and CfCE49; CfCE13  
221 and CfCE63; CfCE14 and CfCE31; CfCE24, CfCE56, CfCE58 and CfCE72 (N-terminal  
222 region [NTR; residues 21–113]; CfCE30 and CfCE70 (IgE-binding proteins); CfPhiA-1 and  
223 CfPhiA-2; and Ecp4, Ecp7 and CfCE72 (C-terminal region [CTR; residues 158–266])  
224 (Tables 1 and S1).

225 As 61 of the 70 apoplasmic ipiSSPs (~87.1%) are novel or have homology to proteins  
226 of unknown function, 10 three-dimensional protein structure prediction servers were  
227 employed to infer possible structural relationships between these and proteins of  
228 characterized tertiary structure and/or function present in the Research Collaboratory for  
229 Structural Bioinformatics Protein Data Bank (RCSB PDB). Three ipiSSPs (CfCE5, CfCE25  
230 and CfCE65) were consistently predicted to have structural homology to Alt a 1 (RCSB PDB  
231 IDs: 3V0R and 4AUD), an allergen protein with a  $\beta$ -barrel fold (Chruszcz et al., 2012) from  
232 the broad host-range Dothideomycete fungal plant pathogen/saprophyte *Alternaria alternata*  
233 (Table S2). Four ipiSSPs (Ecp4, Ecp7, CfCE44 and CfCE72 [CTR]) were consistently  
234 predicted to have structural homology to proteins with a  $\beta/\gamma$ -crystallin fold, including the  
235 plant antimicrobial protein MiAMP1 from *Macadamia integrifolia* (ID: 1C01) (McManus et  
236 al., 1999), and the yeast killer toxin WmKT from *Williopsis mrakii* (ID: 1WKT) (Antuch et  
237 al., 1996) (Table S2). A further three ipiSSPs (CfCE24, CfCE56 and CfCE58) were

238 consistently predicted to have structural homology to the  $\alpha$  and/or  $\beta$  subunit of KP6 (IDs:  
239 1KP6 and 4GVB), a virus-encoded antifungal killer toxin with an  $\alpha/\beta$ -sandwich fold secreted  
240 by the fungal corn smut pathogen *Ustilago maydis* (Allen et al., 2013a; Li et al., 1999) (Table  
241 S2). Notably, the NTR of CfCE72 was found to share sequence homology with CfCE24,  
242 CfCE56 and CfCE58 (Fig. S1A), suggesting that it too adopts a KP6-like fold. The NTR and  
243 CTR of CfCE72 are separated by a putative kexin protease cleavage site (Fig. S1A and  
244 Information S1).

245 Hidden Markov model (HMM)–HMM alignments generated between CfCE5 and Alt  
246 a 1, Ecp4 and MiAMP1, as well as CfCE58 and KP6 $\beta$  (i.e. as part of the HHPred server  
247 output [Söding et al., 2005]), are shown in Fig. S2. In addition to conserved elements of  
248 secondary structure, all three alignments revealed conserved Cys residues. For CfCE5 and Alt  
249 a 1, two conserved Cys residues at positions 50 and 65 (mature proteins), which are also  
250 present in CfCE25 and CfCE65, were identified (Figs S1B and S2A). In Alt a 1, these Cys  
251 residues are known to form an intramolecular disulphide bond (Chruszcz et al., 2012).  
252 Inspection of the predicted CfCE5 tertiary structure, which was modelled using Alt a 1 as a  
253 template in HHpred (MODELLER) (Söding et al., 2005; Webb and Sali, 2002) and RaptorX  
254 (Källberg et al., 2012), suggests that the conserved Cys50/Cys65 pair forms an intramolecular  
255 disulphide bond (Fig. S3A). Furthermore, the predicted structure suggests that the two  
256 remaining Cys residues, Cys24 and Cys29, which are absent from Alt a 1 (Fig. S2A), may  
257 also form an intramolecular disulphide bond, given that they are located in close proximity to  
258 each other (Fig. S3A). This bond, however, would be located in a different location to the  
259 second intramolecular disulphide bond of Alt a 1 (Cys104–Cys116) (Fig. S3A) (Chruszcz et  
260 al., 2012).

261 Five of the six Cys residues present in Ecp4 and MiAMP1 were found to be  
262 conserved (Fig. S2B). In MiAMP1, all six Cys residues are known to form intramolecular  
263 disulphide bonds (Cys11–Cys65, Cys21–Cys76 and Cys23–Cys49) (McManus et al., 1999).  
264 Inspection of the predicted Ecp4 structure, which was modelled using MiAMP1 as a  
265 template, suggests that two of the conserved Cys pairs, Cys16/Cys84 and Cys35/Cys67, form  
266 intramolecular disulphide bonds (Fig. S3B). Although not conserved, the sixth Cys residue in  
267 Ecp4, Cys57, still appears to be located in a favourable position for disulphide bond  
268 formation with Cys99 (Fig. S3B). All six Cys residues in Ecp4 are conserved across Ecp7  
269 and CfCE72 (CTR), although the latter has an additional pair of Cys residues (Fig. S1C).

270 For CfCE58 and KP6 $\beta$ , six conserved Cys residues, which are also present in CfCE24  
271 and CfCE56, were identified (Figs S1A and S2C). In KP6 $\beta$ , these six Cys residues are known



272 to form three intramolecular disulphide bonds (Cys9–Cys74, Cys11–Cys64 and Cys29–  
273 Cys46) (Allen et al., 2013a). The predicted CfCE58 structure, which was modelled using  
274 KP6 $\beta$  as a template, suggests that the three conserved Cys pairs (Cys7/Cys76, Cys9/Cys66  
275 and Cys26/Cys47) form intramolecular disulphide bonds (Fig. S3C). Both CfCE56 and  
276 CfCE58 possess an additional set of Cys residues (Cys1 and Cys60) (Fig. S1A). Cys1 of  
277 CfCE58 is located at the extreme N-terminus, which, if flexible, would be expected to make  
278 contact with Cys60 located at the base of one of the predicted  $\alpha$ -helices (Fig. S3C).

279

### 280 **Most apoplastic ipiSSPs of *C. fulvum* lack an ortholog in *Dothistroma septosporum*.**

281 Of the fungi for which a genome sequence is so far available, *D. septosporum* is the most  
282 closely related to *C. fulvum* (de Wit et al., 2012). Reciprocal BLASTp and tBLASTn searches  
283 were used to determine whether the predicted *D. septosporum* protein catalogue and genome  
284 (de Wit et al., 2012) carry homologs of the 70 *C. fulvum* apoplastic ipiSSPs and their  
285 encoding genes, respectively. For 43 of the 70 ipiSSPs, no homologs were identified (Table  
286 S1). A further four showed limited homology to *D. septosporum* genes, while five others had  
287 homology to pseudogenes (Table S1). The remaining 18 ipiSSPs had likely orthologs in  
288 *D. septosporum*. However, of these, only 11 were up-regulated during infection of pine  
289 (Table S1) (Bradshaw et al., 2016). More specifically, these are the likely orthologs of  
290 Ecp2-1, Ecp6, CfCE33, the three Alt a 1 allergen-like proteins (CfCE5, CfCE25 and  
291 CfCE65), CfCE16, the cerato-platanin (CfCE61), the phialide protein CfPhiA-2 (CfCE53),  
292 CfCE74 and CfCE77 (Table S1). Genes encoding SSPs with a potential  $\beta/\gamma$ -crystallin or  
293 KP6-like fold were absent, pseudogenized, or not expressed during colonization of pine  
294 (Table S1).

295

### 296 **Nine apoplastic ipiSSPs of *C. fulvum* trigger an HR in specific accessions of tomato.**

297 To identify new sources of resistance against *C. fulvum*, wild accessions of tomato were  
298 screened for their ability to recognize apoplastic ipiSSPs using the PVX-based transient  
299 expression system (Hammond-Kosack et al., 1995; Takken et al., 2000). In this experiment,  
300 recombinant viruses were delivered through agroinfection for local (toothpick wounding) or  
301 systemic (cotyledon infiltration) expression of ipiSSPs in tomato, with the pathogenesis-  
302 related 1A (PR1A) signal peptide of tobacco (*Nicotiana tabacum*) used to direct secretion of  
303 these proteins into the tomato leaf apoplast. Plants that showed a chlorotic or necrotic HR  
304 were deemed to have recognized an ipiSSP as an IP.

305 As a starting point, 25 predominantly wild accessions of tomato (Table S3) were  
306 screened for their ability to recognize Ecp7 and/or one or more of 40 CfCEs (Table S1) using  
307 the PVX agroinfection method based on toothpick wounding (Luderer et al., 2002a; Takken  
308 et al., 2000). This set of 40 CfCEs primarily comprises those with the highest level of  
309 expression *in planta*, as based on pre-existing RNA-Seq data shown in Table S1. A fully  
310 expanded leaf from 1–3 representative plants of each accession was inoculated via toothpick  
311 wounding on each side of the main vein, and the presence or absence of an HR was scored at  
312 10 dpi. At the same time, *S. lycopersicum* cv. MM-Cf-0 (no Cf immune receptors; Tigchelaar,  
313 1984) was screened to determine whether Ecp7 or any of the CfCEs trigger a non-specific  
314 HR. Likewise, accessions carrying only the *Cf-1*, *Cf-3*, *Cf-6*, *Cf-9B*, *Cf-11* or *Cf-Ecp3*  
315 immune receptor gene (Table S3) were screened to determine whether Ecp7 or any of the  
316 CfCEs represent one of the yet unknown IP effectors Avr1, Avr3, Avr6, Avr9B, Avr11 or  
317 Ecp3. As positive controls, *S. lycopersicum* cv. MM-Cf-5, which carries only the *Cf-5*  
318 immune receptor (Tigchelaar, 1984), as well as the landrace accession CGN 18399  
319 (*S. lycopersicum* var. *cerasiforme*), from which the *Cf-5* gene was originally identified (Kerr  
320 et al., 1971), were screened for their ability to recognise the IP effector Avr5 (Mesarich et al.,  
321 2014). Empty vector was used as a negative control to confirm that PVX alone does not  
322 trigger a non-specific HR. For the purpose of this experiment, recognition of Ecp7 or a CfCE  
323 was deemed to have occurred if an HR was triggered at one or both of the toothpick  
324 wounding sites on a given tomato leaf.

325 As expected, the empty vector (negative control) failed to trigger an HR in any tomato  
326 accession tested, while Avr5 (positive control) was recognized by only MM-Cf-5 and CGN  
327 18399 (Fig. S4), indicating that the PVX agroinfection method is functional, and that no other  
328 accessions carry the *Cf-5* immune receptor gene. Ten of the 40 CfCEs (CfCE6, CfCE9,  
329 CfCE14, CfCE18, CfCE19, CfCE26, CfCE33, CfCE48, CfCE55 and CfCE59) were  
330 recognized by one to eight predominantly wild accessions of tomato, with HRs ranging from  
331 weak chlorosis to strong necrosis (Fig. S4). Furthermore, 15 of the 25 accessions recognized  
332 between one and four of the 10 CfCEs (Fig. S4). Importantly, none of the 10 CfCEs triggered  
333 an HR in MM-Cf-0, suggesting that the observed responses were specific to the accessions  
334 tested (Fig. S4). None of the accessions carrying the *Cf-1*, *Cf-3*, *Cf-6*, *Cf-9B*, *Cf-11* or  
335 *Cf-Ecp3* immune receptor gene recognized Ecp7 or any of the CfCEs, indicating that these  
336 ipiSSPs do not represent the IP effectors Avr1, Avr3, Avr6, Avr9B, Avr11 or Ecp3. A  
337 schematic of the 10 HR-eliciting CfCEs is shown in Fig. 1.

338 To further confirm recognition of the 10 CfCEs, each was screened for its ability to  
339 trigger a systemic HR in the same responding tomato accessions using the PVX agroinfection  
340 method based on cotyledon infiltration (Mesarich et al., 2014). Here, both cotyledons of five  
341 independent plants were infiltrated, and the presence or absence of an HR was scored at 21  
342 dpi. Consistent with the agroinfection assay based on toothpick wounding, the empty vector  
343 (negative control) did not trigger an HR in any accession tested (Figs 2 and S5). Similarly,  
344 none of the CfCEs triggered an HR in MM-Cf-0 (Fig. S6). For CfCE6, CfCE26, CfCE48 and  
345 CfCE55, recognition could be confirmed across all responding accessions identified in the  
346 toothpick wounding agroinfection assay (Figs 2 and S7–S8). Recognition could also be  
347 confirmed across most, but not all, previously identified accessions for CfCE9, CfCE14,  
348 CfCE18, CfCE33 and CfCE59 (Figs 2 and S9–S13). Indeed, CfCE9, CfCE14, CfCE18 and  
349 CfCE33 only failed to trigger an HR in accessions CGN 15392 (*Solanum arcanum*) (Fig. S9),  
350 CGN 14356 (*Solanum peruvianum*) (Fig. S10), CGN 14357 (*Solanum corneliomuelleri*)  
351 (Fig. S11) and CGN 14353 (*S. pimpinellifolium*) (Fig. S12), respectively, while CfCE59 only  
352 failed to trigger an HR in CGN 14353 and CGN 24034 (*S. pimpinellifolium*) (Fig. S13). In  
353 some cases, the recognition of a CfCE could not be observed across all five plants of a given  
354 accession representing *S. corneliomuelleri* (CGN 14357 and CGN 15793), *S. peruvianum*  
355 (CGN 14355, CGN 14356 and CGN 24192) and *S. pimpinellifolium* (CGN 15946) (Figs 2,  
356 S7, S9, S11 and S13). In all responding accessions, the systemic HR involved weak to strong  
357 necrosis, and was typically associated with moderate to severe stunting (Figs 2, S7–S11 and  
358 S13–S14). The recognition of only one CfCE, CfCE19, could not be confirmed (CGN 24034;  
359 Fig. S15).

360

### 361 **Tomato accessions that recognize apoplastic ipiSSPs are resistant to *C. fulvum*.**

362 To determine whether the accessions of tomato that recognize apoplastic ipiSSPs are resistant  
363 to *C. fulvum*, each, along with *S. lycopersicum* cv. MM-Cf-0, was inoculated with strain  
364 2.4.5.9.11 IPO of this fungus, and symptoms were inspected on leaves from three  
365 independent plants at 14 dpi. Strain 2.4.5.9.11 IPO carries genes corresponding to all nine  
366 HR-eliciting CfCEs (see below), but lacks a functional copy of the previously cloned *Avr2*,  
367 *Avr4*, *Avr4E*, *Avr5* and *Avr9 IP* effector genes (Mesarich et al., 2014; Stergiopoulos et al.,  
368 2007). As expected, *S. lycopersicum* cv. MM-Cf-0 was susceptible to 2.4.5.9.11 IPO  
369 (Fig. S16). In contrast, all other tomato accessions tested were resistant to this strain  
370 (Fig. S16). For accessions CGN 14474 (*S. lycopersicum*) and CGN 15820 (*S. lycopersicum* x  
371 *cheesmaniae*), this resistance was observed across only two of the three independent plants

372 (Fig. S16). While resistant to *C. fulvum*, we cannot exclude the possibility that the set of  
373 resistant tomato accessions carries one or more of, for example, the *Cf* immune receptor  
374 genes *Cf-1*, *Cf-3*, *Cf-6*, *Cf-9B*, *Cf-Ecp1*, *Cf-Ecp2-1*, *Cf-Ecp3*, *Cf-Ecp4*, *Cf-Ecp5* and *Cf-Ecp6*.

375 As CfCE6, CfCE9, CfCE14, CfCE18, CfCE26, CfCE33, CfCE55, CfCE59 and  
376 CfCE48 are present in IWF samples from compatible *C. fulvum*–tomato interactions, and  
377 because these proteins triggered an HR using both PVX agroinfection methods, only these  
378 apoplastic ipiSSPs were pursued further. From this point forward, CfCE6, CfCE9, CfCE14,  
379 CfCE18, CfCE26, CfCE33, CfCE55, CfCE59 and CfCE48 will be referred to as Ecp9-1,  
380 Ecp10-1, Ecp11-1, Ecp12, Ecp13, Ecp14-1, Ecp15 and Ecp16, respectively.

381

382 **Seven HR-eliciting Ecps have one or more homologs in other fungal species, while three**  
383 **HR-eliciting Ecps have one or more paralogs in *C. fulvum*.**

384 To identify homologs of the HR-eliciting Ecps in other fungi, each was screened against the  
385 publicly available protein sequence databases at NCBI and JGI using BLASTp. Additionally,  
386 in those cases where no protein homolog could be identified, Ecps were screened against the  
387 collection of fungal genome sequences present at JGI using tBLASTn (i.e. to identify  
388 homologs without a gene prediction). With the exception of Ecp8 and Ecp16, homologs of all  
389 HR-eliciting Ecps were identified in other fungal species. For Ecp9-1, homologs were  
390 identified in the Dothideomycetes *Pseudocercospora fijiensis* (black sigatoka disease of  
391 banana), *Septoria musiva* and *Septoria populicola* (leaf spot and canker diseases of poplar),  
392 *Teratosphaeria nubilosa* (leaf spot of *Eucalyptus* spp.) and *Zasmidium cellare* (saprobic wine  
393 cellar fungus), as well as eight Sordariomycete species (Fig. S17). Eight paralogs of Ecp9-1  
394 were found to be encoded by the genome of *C. fulvum* strain 0WU (Ecp9-2–Ecp9-9)  
395 (Fig. S18A), with one clear pseudogene also identified (*Ecp9-10*; result not shown). A similar  
396 expansion was found in the Sordariomycete *Claviceps purpurea* (ergot disease of cereals)  
397 (Fig. S17).

398 Homologs of Ecp10-1 were identified in the Dothideomycetes *Pseudocercospora*  
399 *eumusae* and *Pseudocercospora musae* (eumusae leaf spot and yellow sigatoka disease of  
400 banana, respectively), *A. alternata*, *S. musiva*, *S. populicola*, *T. nubilosa* and *Z. cellare*, as  
401 well as *Zymoseptoria ardabiliae*, *Zymoseptoria pseudotritici* and *Zymoseptoria tritici* (leaf  
402 blotch diseases of grasses), *Venturia inaequalis* and *Venturia pirina* (apple and pear scab  
403 disease, respectively), *Clathrospora elyanae* (found growing on curved sedge), *Cochliobolus*  
404 *sativus* and *Cochliobolus victoriae* (cereal pathogens), *Pyrenophora teres* f. *teres* (net blotch  
405 disease of barley), *Pyrenophora tritici-repentis* (tan spot disease of wheat) and *Setosphaeria*

406 *turcica* (northern corn leaf blight disease) (Fig. S19 and Information S2). Homologs of  
407 Ecp10-1 were also identified in several Sordariomycete fungi (Fig. S19 and Information S2).  
408 Interestingly, Ecp10-1 homologs were found to be massively expanded in *V. inaequalis* and  
409 *V. pirina* (Information S2), which is not uncommon for effector candidates from these fungi  
410 (Deng et al., 2017). Smaller expansions were also identified in other fungal plant pathogens  
411 (Information S2). Two paralogs of Ecp10-1 (Ecp10-2 and Ecp10-3) were found to be  
412 encoded by the genome of *C. fulvum* strain 0WU (Fig. S18B).

413 Homologs of the remaining Ecps were only identified in Dothideomycete fungi.  
414 Ecp11-1 was found to have homology to AvrLm3 and AvrLmJ1, two avirulence effector  
415 proteins from *Leptosphaeria maculans* (blackleg disease of Brassica species) (Plissonneau et  
416 al., 2016; van de Wouw et al., 2014), as well as two proteins from *Z. ardabiliae* (Figs 3 and  
417 S20). A single pseudogene of *Ecp11-1* (*Ecp11-2*) was also identified in the genome of  
418 *C. fulvum* strain 0WU (*result not shown*). Ecp12 was found to have multiple homologs in  
419 *S. musiva* and *S. populicola*, with the homologous Cys-rich domain occurring once, or as two  
420 or three tandem repeats (Fig. S21), as has been found for several other effectors from plant-  
421 associated organisms (Mesarich et al., 2015). Homologs of Ecp13 were identified in  
422 *D. septosporum*, *P. fijiensis*, *S. musiva* and *Cercospora zae-maydis* (grey leaf spot disease of  
423 maize) (Fig. S22), while homologs of Ecp14-1 were found in *C. zae-maydis*,  
424 *D. septosporum*, *P. eumusae*, *P. fijiensis*, *P. musae*, *S. musiva*, *S. populicola*, *T. nubilosa*,  
425 *Trypethelium eluteriae* (lichen-forming fungus), *Z. ardabiliae*, *Zymoseptoria brevis* (leaf  
426 blotch disease of barley), *Z. pseudotritici*, *Z. tritici* and *Z. cellare*, with most, including  
427 *C. fulvum*, possessing a paralog (Figs S18C and S23). A single pseudogene of *Ecp14-1*  
428 (*Ecp14-3*) was identified in the genome of *C. fulvum* strain 0WU (*result not shown*). For  
429 Ecp15, homologs were found in *P. fijiensis*, *P. musae* and *Z. ardabiliae* (Fig. S24).

430

#### 431 **Genes encoding HR-eliciting Ecps are induced *in planta*.**

432 RNA-Seq fragments per kilobase (kb) of exon per million fragments mapped (FPKM) values  
433 suggested that all genes encoding an HR-eliciting Ecp of *C. fulvum*, like those encoding all  
434 previously identified IP effectors of this fungus (Mesarich et al., 2014), are induced during  
435 infection of susceptible tomato, when compared to expression during growth *in vitro* in PDB  
436 or Gamborg B5 liquid media (Table S1). To confirm this expression profile, a reverse-  
437 transcription quantitative real-time polymerase chain reaction (RT-qrtPCR) experiment was  
438 performed. Indeed, all genes encoding an HR-eliciting Ecp were found to be induced during

439 infection of susceptible tomato, when compared to expression during growth *in vitro* in PDB  
440 or Gamborg B5 liquid media (Fig. 4).

441

#### 442 **Most genes encoding an HR-eliciting Ecp are associated with repetitive elements.**

443 It is common for *C. fulvum* effector genes to be flanked by a mosaic of repetitive elements in  
444 the genome of strain 0WU (de Wit et al., 2012; Mesarich et al., 2014). It has been proposed  
445 that these elements may assist in the deletion of *IP* effector genes following *Cf* immune  
446 receptor-imposed selection pressure (Mesarich et al., 2014). To determine whether repetitive  
447 elements also flank genes encoding the HR-eliciting Ecps, the genome scaffolds harbouring  
448 each of these genes was screened for repetitive sequence across the *C. fulvum* 0WU genome  
449 using BLASTn. Six of the nine *Ecp* genes (*Ecp8*, *Ecp9-1*, *Ecp10-1*, *Ecp11-1*, *Ecp12* and  
450 *Ecp15*) were found to be associated with repetitive elements at both their 5' and 3' flanks  
451 (Fig. S25). Furthermore, the same six genes were found to reside on small genome scaffolds  
452 of less than 35 kb in length (Table S4). The latter suggests that the scaffolds harbouring these  
453 genes are surrounded by even larger flanking repetitive elements, with these elements  
454 anticipated to have hampered a larger scaffold assembly (Wit et al., 2012). The 5' end of  
455 *Ecp16* is closely associated with repetitive elements, and is present at the 5' end of an ~55-kb  
456 scaffold (Fig. S25). Likewise, *Ecp13* is located at the 3' end of an ~57-kb scaffold, suggesting  
457 the presence of 3' repeats (Fig. S25). In contrast to the *Ecp* genes mentioned above, *Ecp14-1*  
458 is not surrounded by repetitive elements (Fig. S25).

459

#### 460 **Genes encoding an HR-eliciting Ecp exhibit limited allelic variation between strains.**

461 It is common for genes encoding *C. fulvum* *IP* effectors to exhibit allelic variation between  
462 strains, which is often brought about by selection pressure to avoid recognition by  
463 corresponding *Cf* immune receptors (Iida et al., 2015; Joosten et al., 1994; Luderer et al.,  
464 2002a; Mesarich et al., 2014; Westerink et al., 2004). To assess the level of allelic variation  
465 across genes encoding the HR-eliciting Ecps, each was amplified by PCR from 10 different  
466 *C. fulvum* strains (Table S5), sequenced, and compared to the corresponding sequence from  
467 strain 0WU. All nine *Ecp* genes could be amplified by PCR from genomic DNA samples  
468 representing the 10 *C. fulvum* strains. Of the nine genes, four, namely *Ecp9-1*, *Ecp10-1*,  
469 *Ecp13* and *Ecp15*, exhibited no allelic variation between strains. For *Ecp8* and *Ecp16*, allelic  
470 variation was observed; however, this variation did not result in a change of amino acid  
471 sequence. More specifically, in six strains (2.4, 2.4.5, 2.5, 2.9, 4 and 7320), *Ecp8* had a single

472 synonymous CCC→CCT substitution at position 153, while in four strains (2.4, 2.4.5, 2.5  
473 and 4), *Ecp16* had a trinucleotide insertion (CTT) at position 234 in an intron (Fig. 5). For  
474 each of the remaining three genes, a single non-synonymous substitution was identified: a  
475 TTT→GTT (Phe119Val) change at position 355 in *Ecp11-1* of strain 2.9; a GGG→AGG  
476 (Gly124Arg) change at position 484 in *Ecp12* of strains 2.9 and 7320; and an AAG→GAG  
477 (Lys148Glu) change at position 501 in *Ecp14-1* of strains 2.4, 2.4.5, 2.4.5.9.11 IPO, 2.4.9.11,  
478 2.5, 2.9 and 4 (Fig. 5). A G→T mutation at position 386 of the *Ecp14-1* intron in strains 2.4,  
479 2.4.5, 2.4.5.9.11 IPO, 2.4.9.11, 2.5 and 4, as well as a synonymous GGG→GGA substitution  
480 at position 452 in *Ecp14-1* of strains 2.4, 2.4.5, 2.4.5.9.11 IPO, 2.4.9.11, 2.5, 2.9 and 4, were  
481 also identified (Fig. 5). It is not yet known whether the non-synonymous substitutions  
482 identified in *Ecp11-1*, *Ecp12* and *Ecp14-1* allow *C. fulvum* to overcome resistance mediated  
483 by the putative *Cf-Ecp11-1*, *Cf-Ecp12* and *Cf-Ecp14-1* immune receptor genes, respectively.

484

## 485 DISCUSSION

486 Leaf mould disease of tomato, caused by the fungal pathogen *C. fulvum*, is a re-emerging  
487 problem worldwide. This re-emergence is due to intensive year-round cultivation of resistant  
488 tomato cultivars, which have selected for natural strains of this fungus capable of  
489 overcoming, for example, one or more of all cloned *Cf* immune receptor genes (Hubbeling,  
490 1978; Iida et al., 2015; Laterrot, 1986; Li et al., 2015). To combat these strains, new *Cf*  
491 immune receptor genes need to be identified. Wild tomato is a rich source of resistance  
492 against *C. fulvum* (Kruijt et al., 2005; Laugé et al., 1998, 2000; van der Hoorn et al., 2001b).  
493 In this study, an effectoromics approach (Domazakis et al., 2017; Du and Vleeshouwers,  
494 2014) based on apoplastic ipiSSPs of *C. fulvum* was used to identify wild accessions of  
495 tomato carrying new *Cf* immune receptor genes.

496 As a starting point for this approach, proteomics and transcriptome sequencing were  
497 used to identify fungal SSPs most relevant to the *C. fulvum*–tomato interaction. Altogether,  
498 70 apoplastic ipiSSPs, made up of all 11 characterized SSP effectors of this fungus (Bolton et  
499 al., 2008; Joosten et al., 1994; Laugé et al., 2000; Luderer et al., 2002a; Mesarich et al., 2014;  
500 van den Ackerveken et al., 1993; van Kan et al., 1991; Westerink et al., 2004), as well as 32  
501 previously described (Mesarich et al., 2014) and 27 new CfCEs, were identified in IWF  
502 samples from compatible *C. fulvum*–*S. lycopersicum* cv. H-Cf-0 interactions. Strikingly, all  
503 but eight of these ipiSSPs are Cys-rich and possess an even number of Cys residues.  
504 Consistent with that shown for Avr4, Avr9, Ecp1, Ecp2-1, Ecp5 and Ecp6, it is likely that  
505 many of these Cys residues form intramolecular disulphide bonds required for stability and

506 function in the protease-rich leaf apoplast of tomato (Joosten et al., 1997; Luderer et al.,  
507 2002b; Sánchez-Vallet et al., 2013; van den Burg et al., 2003; van den Hooven et al., 2001).

508       Following signal peptide cleavage, several of the ipiSSPs likely undergo further post-  
509 translational processing in the ER–Golgi secretory pathway. Twenty-five ipiSSPs possess one  
510 or more NXS/T motifs following their predicted signal peptide cleavage site, suggesting that  
511 they undergo N-linked glycosylation. This glycosylation may be required for ipiSSP folding,  
512 structure, stability, solubility, oligomerization, or function (Helenius and Aebi, 2001). A  
513 further six ipiSSPs possess a putative N-terminal kexin protease cleavage site (LXXK/PR  
514 motif), suggesting that they have a propeptide domain. It is possible that these ipiSSPs are  
515 synthesized as inactive precursors, and that, for biological activity, their propeptide domain  
516 must be removed by a kexin protease (Rockwell et al., 2002).

517       BLAST homology searches revealed that, in addition to Avr4 (single CBM\_14  
518 domain; PF01607) (van den Burg et al., 2003), Ecp2-1 (single Hce2 domain; PF14856)  
519 (Stergiopoulos et al., 2012), Ecp6 (three LysM domains; PF01476) (Bolton et al., 2008) and  
520 CfPhiA-1 (phialide protein) (Bolton et al., 2008), five other ipiSSPs, specifically CfPhiA-2,  
521 CfCE60, CfCE61, CfCE69 and Ecp14-1, possess a known functional domain or have  
522 homology to proteins with a characterized biological function. Of these, CfPhiA-2 has  
523 homology to CfPhiA-1 and other phialide proteins from Ascomycete fungi. To date, the best  
524 characterized of these homologs is PhiA from *Aspergillus nidulans*, which localizes to the  
525 cell wall of phialides and conidia (Melin et al., 2003). PhiA plays an essential role in the  
526 development of phialides, which are sporogenous cells that produce and release conidia  
527 through a specialized apical budding process (Melin et al., 2003).

528       CfCE60 has a GPI-anchored superfamily domain (PF10342), but is not predicted to  
529 possess a GPI anchor modification site. Little functional information is available for secreted  
530 proteins with this domain. However, in the Basidiomycete fungus *Lentinula edodes* (shiitake  
531 mushroom), the PF10342 domain-containing protein Le.DRMIP, which also possesses a  
532 mitochondrial targeting signal peptide and transmembrane domain, interacts with the  
533 developmentally regulated MAP kinase Le.MAPK. Both proteins have been proposed to play  
534 a role in cell differentiation during fruiting body development (Szeto et al., 2007).

535       CfCE61 is a member of the cerato-platanins (PF07249), a class of proteins ubiquitous  
536 to filamentous fungi that adopts a double  $\Psi\beta$ -barrel fold similar to domain one of expansins  
537 (Chen et al., 2013; de Oliveira et al., 2011). Cerato-platanins are predominantly secreted,  
538 although several also localize to the cell wall of ascospores, conidia and hyphae (e.g. Boddi et  
539 al., 2004; Pazzagli et al., 1999). Cerato-platanins are postulated to carry out multiple



540 biological functions related to fungal growth and development, as well as to plant–fungus  
541 interactions. Notably, cerato-platanins bind chitin, but not cellulose (Bacelli et al., 2014; de  
542 O. Barsottini et al., 2013; Frischmann et al., 2013), yet several members have expansin-like  
543 activity *in vitro*, loosening cellulosic materials (Bacelli et al., 2014; de O. Barsottini et al.,  
544 2013). It has thus been hypothesized that cerato-platanins may function as expansins required  
545 for fungal cell wall remodelling and enlargement, possibly by disrupting non-covalent  
546 interactions between  $\beta$ -glucan or chitin molecules (de Oliveira et al., 2011). Epl1, a surface-  
547 active cerato-platanin from the biocontrol agent *Trichoderma atroviride*, self-assembles at the  
548 air/water interface, forming protein films that increase the polarity of solutions and surfaces  
549 (Frischmann et al., 2013). This suggests an additional role for cerato-platanins in increasing  
550 the wettability of hyphae, enabling them to grow in aqueous environments, or in protecting  
551 them from desiccation (Frischmann et al., 2013).

552 Deletion of the gene encoding MSP1, a cerato-platanin from the rice blast pathogen  
553 *Magnaporthe oryzae*, resulted in reduced virulence *in planta*, suggesting that certain  
554 members of this protein class function as effectors (Jeong et al., 2007). In line with this,  
555 preliminary studies have suggested that MpCP5, a cerato-platanin from *Moniliophthora*  
556 *perniciosa* (witches' broom disease of cocoa) may, like Ecp6, perturb chitin-triggered  
557 immunity (de O. Barsottini et al., 2013), while cerato-platanins from *Fusarium graminearum*  
558 (cereal head blight disease) may, like Avr4, protect fungal cell wall polysaccharides from  
559 enzymatic digestion by chitinases and  $\beta$ -1,3-glucanases (Quarantin et al., 2016). Some cerato-  
560 platanins are also well-known IPs that trigger a non-specific HR upon recognition by  
561 corresponding host immune receptors (e.g. Frías et al., 2011, 2014). This, however, does not  
562 appear to be the case for CfCE61, which failed to trigger an HR in tomato.

563 CfCE69 contains an HsbA domain (PF12296), which was originally identified in the  
564 HsbA protein from *Aspergillus oryzae* (Ohtaki et al., 2006), a filamentous fungus commonly  
565 used in the fermentation industry. In culture, HsbA is secreted in the presence of the  
566 hydrophobic polymer polybutylene succinate-*co*-adipate (PBSA). HsbA binds PBSA, and in  
567 doing so, recruits CutL1, a polyesterase/cutinase, for its degradation (Ohtaki et al., 2006).

568 Ecp14-1 is a member of the hydrophobins, a fungal-specific class of surface-active  
569 proteins (Wessels, 1994). With the exception of eight conserved Cys residues, which form  
570 four intramolecular disulphide bonds, hydrophobins share limited sequence similarity  
571 (Wessels, 1994). Ecp14-1 is the twelfth hydrophobin, and sixth class II hydrophobin, to be  
572 identified from *C. fulvum* (de Wit et al., 2012; Nielsen et al., 2001; Segers et al., 1999; Spanu,  
573 1997). It is also the first hydrophobin to be identified from this fungus that is exclusively

574 expressed *in planta* (Fig. 4). Hydrophobins are initially secreted in a soluble form, but then  
575 spontaneously localize to hydrophilic:hydrophobic interfaces, where they assemble into  
576 insoluble, amphipathic layers (Sunde et al., 2017). Hydrophobins are typically found on the  
577 outer cell wall surface of aerial hyphae, fruiting bodies and spores, where they reduce  
578 wettability, or significantly decrease the surface tension of moist environments, allowing  
579 these structures to grow in the air (Wösten et al., 1999). Other roles related to surface  
580 perception, attachment to hydrophobic surfaces, and plant colonization have also been shown  
581 (Kim et al., 2005; Talbot et al., 1993, 1996). So far, the function of only one *C. fulvum*  
582 hydrophobin, HCf-1 (Class I), has been determined. HCf-1 is required for efficient water-  
583 mediated dispersal of conidia (Whiteford and Spanu, 2001).

584 Unlike those described above, BLAST homology searches revealed that most  
585 *C. fulvum* ipiSSPs (61 of 70) are novel or have homology to proteins of unknown function.  
586 Remarkably, 10 of these ipiSSPs were consistently predicted to have structural homology to  
587 proteins present in the RCSB PDB. Of these, CfCE5, CfCE25 and CfCE65 were predicted to  
588 be structurally homologous to Alt a 1 from *A. alternata*, which adopts a  $\beta$ -barrel fold unique  
589 to fungi (Chruszcz et al., 2012; de Vouge et al., 1996). Recent studies have shown that Alt a 1  
590 is an effector protein with multiple roles in promoting host colonization. Initially, Alt a 1  
591 localizes to the cytoplasm and cell wall of *A. alternata* spores (Garrido-Arandia et al., 2016b;  
592 Gómez-Casado et al., 2014). In humid settings, these spores then germinate, and in  
593 environments with a pH range of between 5.0 and 6.5, Alt a 1 is released as a tetramer  
594 carrying a fungal methoxyflavonol ligand similar to the plant flavonol quercetin (Garrido-  
595 Arandia et al., 2016a, b). In the same pH range, which is typical of apoplastic environments,  
596 this complex breaks down, releasing Alt a 1 monomers and the flavonol ligand (Garrido-  
597 Arandia et al., 2016a, b). The Alt a 1 monomers then function as competitive inhibitors of  
598 extracellular plant defence proteins belonging to the pathogenesis-related 5-thaumatin-like  
599 protein (PR5-TLP) family (Gómez-Casado et al., 2014), while the flavonol ligand detoxifies  
600 reactive oxygen species (ROS) (Garrido-Arandia et al., 2016b). It remains to be determined  
601 whether CfCE5, CfCE25 and CfCE65 function in a similar manner during colonization of the  
602 tomato leaf apoplast by *C. fulvum*. Interestingly, homologs of CfCE5, CfCE25 and CfCE65  
603 are encoded by the genome of *D. septosporum* (de Wit et al., 2012), and these genes are up-  
604 regulated during the infection of pine (Bradshaw et al., 2016). This suggests that the Alt a 1  
605 allergen-like proteins, together with the cerato-platanin, Ecp2-1, Ecp6 and Ecp14-1, which  
606 are also ipiSSPs of *D. septosporum* (Bradshaw et al., 2016; de Wit et al., 2012), are core

607 effectors that play important roles in the virulence of both pathogens. These *D. septosporum*  
608 ipiSSPs have been shortlisted for future functional characterization (Hunziker et al., 2016).

609 Four of the nine ipiSSPs, specifically Ecp4, Ecp7, CfCE72 (CTR) and CfCE44, were  
610 predicted to be structurally homologous to proteins with a  $\beta/\gamma$ -crystallin fold. This fold,  
611 which typically comprises two four-stranded, anti-parallel Greek key motifs, was originally  
612 identified in structural proteins responsible for maintaining the refractive index and  
613 transparency of the vertebrate eye lens (Blundell et al., 1981; Wistow et al., 1983). However,  
614 this fold is now known to occur in a variety of functionally diverse proteins representing all  
615 major taxonomic groups of organisms (Kappé et al., 2010; Mishra et al., 2014). A key feature  
616 of this fold in many microbial members is a double clamp N/DN/DXXS/TS Ca<sup>2+</sup>-binding  
617 motif required for structure and/or function (Srivastava et al., 2014). This motif, however, is  
618 not present in Ecp4, Ecp7, CfCE72 (CTR) or CfCE44.

619 Strikingly, Ecp4, Ecp7 and CfCE72 (CTR) share a Cys spacing profile with  
620 MiAMP1, a plant antimicrobial protein with a  $\beta/\gamma$ -crystallin fold from nut kernels of *M.*  
621 *integrifolia* (Marcus et al., 1997; McManus et al., 1999). Purified MiAMP1 exhibits broad  
622 spectrum inhibitory activity against several plant-pathogenic fungi, oomycetes and gram-  
623 positive bacteria *in vitro* (Marcus et al., 1997). Some microbes, however, including several  
624 plant- and animal-pathogenic fungi, as well as gram-negative bacteria appear to be insensitive  
625 (Marcus et al., 1997). It has been concluded that, to confer broad spectrum antimicrobial  
626 activity, MiAMP1 must act on molecules and/or cell structures common to a wide range of  
627 microbial organisms (Marcus et al., 1997). Although a specific mode of action for MiAMP1  
628 has not yet been determined (Stephens et al., 2005), more functional information is available  
629 for Sp-AMP3, a homolog of this protein from Scots pine, *Pinus sylvestris* (Asiegbu et al.,  
630 2003; Sooriyaarachchi et al., 2011). Purified Sp-AMP3 protein has antifungal activity against  
631 the plant-pathogenic, root-rotting Basidiomycete *Heterobasidion annosum*, and as part of  
632 this, causes morphological changes in the hyphae and spores of this fungus (Sooriyaarachchi  
633 et al., 2011). To test the hypothesis that the biological function of Sp-AMP3 involves a fungal  
634 cell wall target, carbohydrate-binding assays were performed. These assays revealed that Sp-  
635 AMP3 binds to both soluble and insoluble  $\beta$ -1,3-glucans with high affinity, but not to  
636 insoluble chitin or chitosan (Sooriyaarachchi et al., 2011). Based on these results, it was  
637 hypothesized that differences in cell wall composition would allow Sp-AMP3 to act on some,  
638 but not all fungi (Sooriyaarachchi et al., 2011). It is possible that in sensitive fungi, Sp-Amp3  
639 binding interferes with glucan assembly. This could then alter cell wall structure, causing the

640 abovementioned morphological changes, or could result in cell lysis through compromised  
641 cell wall integrity (Sooriyaarachchi et al., 2011).

642 The three remaining ipiSSPs, specifically CfCE24, CfCE56 and CfCE58, were  
643 predicted to be structurally homologous to KP6, a killer toxin secreted by specific strains of  
644 the fungal corn smut pathogen *U. maydis*. These strains exhibit a “killer” phenotype, which is  
645 due to persistent infection by a KP6-producing double-stranded RNA *Totivirus*, P6. Upon  
646 secretion, KP6 kills competing, uninfected strains of *U. maydis* (Allen et al., 2013b; Koltin  
647 and Day, 1975). Resistance to KP6 in these killer strains is provided by *p6r*, an unknown,  
648 non-virus-encoded recessive nuclear host gene (Finkler et al., 1992; Koltin and Day, 1976;  
649 Puhalla, 1968). Although a preliminary study suggested that KP6 was only active against  
650 grass smut fungi of the order Ustilaginales, with several bacterial and other fungal species  
651 shown to be insensitive (Koltin and Day, 1975), it is now clear that KP6 has antifungal  
652 activity against other selected plant-pathogenic fungi (Smith and Shah, 2015).

653 KP6 is translated as a single polypeptide, but is processed into two subunits, KP6 $\alpha$   
654 and KP6 $\beta$ , by a kexin protease during passage through the ER–Golgi secretory pathway. This  
655 processing involves the removal of a central 31-amino acid residue linker region (Tao et al.,  
656 1990), which may serve to keep the two subunits in an inactive protoxin form until the final  
657 stages of export (Allen et al., 2013a). Both subunits adopt a core  $\alpha/\beta$ -sandwich fold (Allen et  
658 al., 2013a; Li et al., 1999). KP6 functions only as a heterodimer, with both subunits required  
659 for cytotoxic activity (Peery et al., 1987). Assays where sensitive *U. maydis* cells were treated  
660 with KP6 $\alpha$  or KP6 $\beta$  alone, or with one subunit after another, but with a washing step in  
661 between, strongly suggest that KP6 $\alpha$  is responsible for targeting the cell, while KP6 $\beta$  is  
662 cytotoxic (Peery et al., 1987). The specific mode of action for KP6, however, remains  
663 unclear. An early study found that spheroplasts derived from a sensitive strain of *U. maydis*  
664 were insensitive to KP6, but when the cell wall was given time to regenerate, sensitivity  
665 could be restored (Steinlauf et al., 1988). Based on this result, it was inferred that some sort  
666 of recognition site was located on the cell wall that then directed KP6 to its cellular target  
667 (Steinlauf et al., 1988). However, as was pointed out by Allen et al. (2013b), the cell wall-  
668 degrading enzyme preparation used to generate the spheroplasts, Novozyme 234, has residual  
669 protease activity (Hamlyn et al., 1981). For this reason, a proteinaceous cell membrane  
670 receptor for KP6 cannot yet be ruled out. One possibility is that KP6 $\alpha$  forms strong  
671 interactions with membrane-associated proteins of the target cell, with KP6 $\beta$  subsequently  
672 recruited to the plasma membrane or imported to an intracellular target to cause cell lysis  
673 (Allen et al., 2013a). Interestingly, limited amino acid sequence homology was identified

674 between CfCE72 (NTR) and the KP6-like ipiSSPs CfCE24, CfCE56 and CfCE58. This  
675 suggests that CfCE72 (NTR) also adopts a KP6-like fold. A putative kexin protease cleavage  
676 site is located between the NTR and CTR ( $\beta/\gamma$ -crystallin-like domain) of CfCE72, implying  
677 that this ipiSSP undergoes similar post-translational processing to KP6 upon passage through  
678 the ER–Golgi secretory pathway.

679 In total, 10% of the *C. fulvum* ipiSSPs (seven of 70) are predicted to possess a domain  
680 typical of antimicrobial proteins. This raises the possibility that *C. fulvum* dedicates a  
681 significant proportion of its apoplastic secretome to functions associated with microbial  
682 antagonism, perhaps to outcompete other microbial organisms for nutrients and space in the  
683 apoplastic environment, or to provide a form of self-defence (Rovenich et al., 2014). Further  
684 studies are now required to establish whether any overlap exists between the *in planta*  
685 functions of the  $\beta/\gamma$ -crystallin/KP6 proteins and the ipiSSPs Ecp4, Ecp7, CfCE24, CfCE44,  
686 CfCE56, CfCE58 and CfCE72.

687 Of course, it remains possible that the predicted similarities in tertiary structure do not  
688 extend to biological function. Instead, these folds may be more common than previously  
689 thought, irrespective of whether they have evolved from an ancestral protein or by convergent  
690 evolution, providing solutions to typical problems faced at the hostile host–pathogen  
691 interface. For example, the abovementioned folds may provide enhanced stability in protease-  
692 rich environments. Alternatively, they may provide a flexible molecular scaffold for  
693 functional diversification and/or the evasion of recognition by corresponding host immune  
694 receptors. Recently, the IP effectors Avr1-CO39, AVR-Pia and AvrPiz-t from *M. oryzae*, as  
695 well as the ToxB effector from *P. tritici-repentis*, were found to be structurally related (de  
696 Guillen et al., 2015). Structure-informed pattern searches subsequently revealed that several  
697 other effector candidates from Sordariomycete and Dothideomycete plant pathogens likely  
698 share this fold. This led the authors to hypothesize that “the enormous number of sequence-  
699 unrelated Ascomycete effectors may in fact belong to a restricted set of structurally  
700 conserved effector families” (de Guillen et al., 2015). Certainly, the predicted structural  
701 relationship between Alt a 1 and CfCE5/CfCE25/CfCE65 further supports this hypothesis.

702 Of the 70 apoplastic ipiSSPs from *C. fulvum*, 41 were screened for recognition by  
703 wild tomato accessions using an effectoromics approach based on the PVX transient  
704 expression system (Hammond-Kosack et al., 1995; Takken et al., 2000). Such an approach  
705 has already proven to be successful for the identification of plants carrying immune receptor  
706 genes active against other pathogens. For example, of 54 RXLR effectors from the oomycete  
707 potato late blight pathogen *Phytophthora infestans*, 31 were found to trigger an HR in one or

708 more of 10 resistant wild *Solanum* accessions, with each accession recognizing between five  
709 and 24 effectors (Vleeshouwers et al., 2008). Using the same set of 54 RXLR effectors, 48  
710 were then shown to trigger an HR in one or more of 42 accessions of pepper (*Capsicum*  
711 *annuum*), a non-host of *P. infestans*, with each accession recognizing between one and 36  
712 effectors (Lee et al., 2014). In the current study, nine *C. fulvum* ipiSSPs (Ecps) were found to  
713 trigger an HR in one or more of 14 specific wild accessions of tomato. This suggests that nine  
714 new IP effectors of this fungus, as well as nine new corresponding *Cf* immune receptor genes,  
715 have been uncovered. One of the recognized Ecps, Ecp11-1, is a homolog of AvrLm3, an IP  
716 effector from *L. maculans* (Plissonneau et al., 2016). This suggests that both tomato and  
717 Brassica carry an immune receptor capable of recognizing this class of effector.

718 Consistent with *Ecp1*, *Ecp2-1*, *Ecp4* and *Ecp5* (Stergiopoulos et al., 2007), but in  
719 contrast to *Avr2*, *Avr4*, *Avr4E*, *Avr5* and *Avr9* (Iida et al., 2015; Mesarich et al., 2014;  
720 Stergiopoulos et al., 2007), all new *Ecp* genes were found to exhibit limited allelic variation  
721 across strains collected from around the world. As has been suggested for *Ecp1*, *Ecp2-1*,  
722 *Ecp4* and *Ecp5* (Stergiopoulos et al., 2007), this limited allelic variation could reflect a lack  
723 of selection pressure imposed on the pathogen to overcome *Cf-Ecp* immune receptor-  
724 mediated resistance, since, as far as we are aware, none of the putative corresponding *Cf*  
725 immune receptor genes have yet been deployed in commercial tomato cultivars.  
726 Alternatively, this lack of allelic variation could reflect selective constraints on the Ecps to  
727 maintain their protein sequences (i.e. to ensure full virulence of the pathogen). Of note, all  
728 new *Ecp* genes, with the exception of *Ecp14-1*, are associated with repetitive elements in the  
729 genome of *C. fulvum* strain 0WU. It is possible that homologous recombination between  
730 flanking repeat elements could result in the deletion of these genes, like that hypothesized for  
731 strains lacking the repeat-associated IP effector genes *Avr4E*, *Avr5* or *Avr9* (Mesarich et al.,  
732 2014; van Kan et al., 1991; Westerink et al., 2004). Thus, to increase potential durability, new  
733 *Cf* immune receptor genes should be stacked in resistant tomato cultivars.

734 In our study, we frequently observed that not all five representatives of a given  
735 *S. corneliomuelleri*, *S. peruvianum*, or *S. pimpinellifolium* accession recognized an Ecp  
736 effector. This is not surprising, because both *S. corneliomuelleri* and *S. peruvianum* are  
737 typically self-incompatible, while *S. pimpinellifolium* is facultatively self-compatible (Peralta  
738 and Spooner, 2006). In other words, genetic variation is expected to exist between  
739 representatives of accessions from these species, with this variation extending to the presence  
740 or absence of corresponding functional *Cf* immune receptor gene alleles. This may explain  
741 why CfCE19 (Ecp17) gave such a strong HR in accession CGN 24034 using the toothpick

742 assay (Fig. S4), but no HR in the agroinfiltration assay (i.e. plants lacking a corresponding  
743 functional immune receptor gene allele have been missed by chance) (Fig. S15). This may  
744 also be true for Ecp9-1 on CGN 15392 (*S. arcanum* [typically self-incompatible]; Fig. S9),  
745 Ecp10-1 on CGN 14356 (Fig. S10), Ecp11-1 on CGN 14357 (Fig. S11), and Ecp13 on CGN  
746 14353 (Fig. S12).

747 *Cf* immune receptor genes present in self-compatible accessions can be easily  
748 introgressed into commercial and breeder's cultivars of *S. lycopersicum* by backcrossing. In  
749 cases of incompatibility, it may be possible to avoid the problems associated with barriers to  
750 genetic crossing through a more extensive screen of wild tomato germplasm to identify self-  
751 compatible species capable of recognizing the Ecps. This strategy has been successful for the  
752 identification of wild potato species that recognize the AVRblb1 IP effector of *P. infestans*  
753 (Vleeshouwers et al., 2008). Using an effectoromics approach based on the PVX transient  
754 expression system, it was initially determined that the wild potato species *Solanum*  
755 *bulbocastanum*, which is not directly sexually compatible with cultivated potato, *Solanum*  
756 *tuberosum*, carries an immune receptor gene, *RB/Rpi-blb1*, corresponding to *AVRblb1*  
757 (Vleeshouwers et al., 2008). As direct introgression of *RB/Rpi-blb1* from *S. bulbocastanum* to  
758 *S. tuberosum* is not possible, additional screening was carried out to identify wild potato  
759 accessions that are both sexually compatible with cultivated potato and that recognise  
760 AVRblb1. HR-associated recognition of AVRblb1 was quickly detected in the sexually  
761 compatible species *Solanum stoloniferum*, which was subsequently found to carry *Rpi-sto1*, a  
762 functional homolog of *RB/Rpi-blb1* (Vleeshouwers et al., 2008). Importantly, in our study,  
763 several accessions were found to recognize the same Ecp effectors, suggesting that this  
764 approach could be possible in tomato. Further support is provided by the fact that the *Cf-9*  
765 and *Cf-4* immune receptor genes are conserved across the *Solanum* genus (Kruijt et al., 2005;  
766 Laugé et al., 2000; van der Hoorn et al., 2001b).

767 The finding that most new HR-eliciting Ecps have homologs in other plant-  
768 pathogenic fungal species raises the possibility of cross-species resistance. In support of this  
769 possibility, the *Cf-4* immune receptor has been shown to recognize homologs of Avr4 from  
770 *D. septosporum*, *P. fijiensis* and *Pseudocercospora fuligena* (black leaf mould disease of  
771 tomato) (de Wit et al., 2012; Kohler et al., 2016; Stergiopoulos et al., 2010), while the  
772 *Cf-Ecp2-1* immune receptor has been shown to recognize homologs of Ecp2-1 from  
773 *D. septosporum* and *P. fijiensis* (de Wit et al., 2012; Stergiopoulos et al., 2012). It must be  
774 pointed out, however, that the *Cf-4* immune receptor does not recognize homologs of Avr4  
775 from *Cercospora apii*, *Cercospora beticola* and *Cercospora nicotianae* (leaf spot disease of

776 celery, beet and tobacco, respectively) (Mesarich et al., 2016; Stergiopoulos et al., 2012).  
777 With this in mind, it is clear that to provide effective resistance in a recipient plant species,  
778 the product of any transferred *Cf* immune receptor gene must recognize an epitope (direct  
779 recognition) or virulence function (indirect recognition) conserved to both the corresponding  
780 *C. fulvum* effector and its homolog from the target fungal pathogen.

781

## 782 **CONCLUSIONS**

783 In this study, proteomics and transcriptome sequencing were used to identify a set of 70  
784 apoplastic ipiSSPs from *C. fulvum*, which is made up of all 11 IP effectors of this fungus, as  
785 well as 59 CfCEs. These ipiSSPs provide new insights into how *C. fulvum* promotes  
786 colonization of the tomato leaf apoplast. Using an effectoromics approach, nine CfCEs (Ecps)  
787 were found to be recognized by specific wild accessions of tomato. These accessions likely  
788 carry new *Cf* immune receptor genes available for incorporation into cultivated tomato.

789

## 790 **MATERIALS AND METHODS**

### 791 **General.**

792 In this study, all kits and reagents were used, unless otherwise specified, in accordance with  
793 the manufacturer's instructions.

794

### 795 ***C. fulvum* strains and tomato accessions.**

796 *C. fulvum* strains and tomato accessions used in this study are shown in Tables S5 and S3,  
797 respectively.

798

### 799 **Isolation of IWF from the leaf apoplast of *C. fulvum*-infected tomato.**

800 Four- to five-week-old H-Cf-0 tomato plants were inoculated with strain 0WU, 4, IPO 1979,  
801 or IPO 2559 of *C. fulvum* (compatible interactions). For this purpose, conidia preparation,  
802 inoculation, and growth conditions were identical to that described by Mesarich et al. (2014).  
803 At 10–17 dpi, IWF was harvested from tomato leaves visibly infected with *C. fulvum* using a  
804 previously described protocol (de Wit and Spikman, 1982; Joosten, 2012). Leaf debris and  
805 fungal material were then removed by centrifugation at  $12,000 \times g$  and  $4^\circ\text{C}$  for 20 min, and  
806 the IWF samples stored at  $-20^\circ\text{C}$  until required.

807

808

809



810 **Preparation of IWF samples for LC–MS/MS analysis.**

811 Frozen IWF samples were thawed on ice and any precipitant formed during the freeze-thaw  
812 process removed by centrifugation at  $12,000 \times g$  and  $4^\circ\text{C}$  for 20 min. IWF samples were  
813 concentrated 3–300 $\times$  by: (i) pressure filtration at  $4^\circ\text{C}$  using an Amicon 8400 series Stirred  
814 Cell Ultrafiltration Unit (EMD Millipore) fitted with an Ultracel regenerated cellulose PLAC  
815 1 kDa nominal molecular weight limit (NMWL) ultrafiltration membrane disc (EMD  
816 Millipore); (ii) centrifugation at  $4,000 \times g$  and  $4^\circ\text{C}$  in a 3 kDa NMWL Amicon Ultra-15  
817 Centrifugal Filter Unit (EMD Millipore) or a Vivaspin 20 3 kDa molecular weight cut-off  
818 (MWCO) Polyethersulfone (PES) ultrafiltration device (GE Healthcare); or (iii) sequential  
819 acetone precipitation, as described by May et al. (1996), with final resuspension in 1 ml  
820  $\text{dH}_2\text{O}$ . Following concentration, IWF samples were transferred to 2 ml LoBind  
821 microcentrifuge tubes (Eppendorf), and stored at  $-20^\circ\text{C}$  until required for further processing.  
822 When required, frozen IWF samples were thawed on ice and any precipitant formed during  
823 the freeze-thaw process removed by centrifugation at  $12,000 \times g$  and  $4^\circ\text{C}$  for 20 min. A filter-  
824 aided sample preparation protocol (Lu et al., 2011), or an in-gel digestion protocol (Karimi  
825 Jashni et al., 2015), both based on trypsin digestion, were then used to prepare samples for  
826 LC–MS/MS analysis.

827

828 **LC–MS/MS analysis.**

829 IWF samples were analysed by nano-scale (n)LC–MS/MS with a Proxeon EASY nLC system  
830 connected to a LTQ-Orbitrap XL mass spectrometer (Lu et al., 2011) at the Laboratory of  
831 Biochemistry, Wageningen University. LC–MS runs and associated MS/MS spectra were  
832 analysed with the MaxQuant v1.3.0.5 suite (Cox and Mann, 2008), with default settings  
833 applied to the integrated Andromeda peptide search engine (Cox et al., 2011), bar one  
834 exception: extra variable modifications were set for the de-amidation of Asn and Gln.  
835 MS/MS spectra were searched against one of four sequence databases. These were built from:  
836 (i) a collection of common contaminants including, for example, BSA (P02769; bovine serum  
837 albumin precursor), trypsin (P00760; bovine), trypsin (P00761; porcine), keratin K22E  
838 (P35908; human), keratin K1C9 (P35527; human), keratin K2C1 (P04264; human) and  
839 keratin K1CI (P35527; human); (ii) a six-frame translation of tomato (*S. lycopersicum* cv. H-  
840 Cf-0) genome sequence (Tomato Genome Consortium, 2012); (iii) the predicted protein  
841 catalogue of *C. fulvum* strain 0WU (de Wit et al., 2012; Mesarich et al., 2014), as well as a  
842 six-frame translation of the most highly abundant *de novo*-assembled *in vitro* and *in planta*  
843 RNA-Seq reads of this fungus (Mesarich et al., 2014); and (iv) a six-frame translation of the

844 repeat-masked *C. fulvum* strain 0WU genome sequence (de Wit et al., 2012). The “label-free  
845 quantification (LFQ)” and “match between runs” (set to 2 min) options were enabled. De-  
846 amidated peptides were allowed to be used for protein quantification. All other quantification  
847 settings were kept at default. Filtering and further bioinformatic analysis of the  
848 MaxQuant/Andromeda workflow output and the analysis of abundances for the identified  
849 proteins were performed with the Perseus v1.3.0.4 module as part of the MaxQuant suite.  
850 Peptides and proteins with a false discovery rate of less than 1%, as well as proteins with at  
851 least one peptide across two or more IWF samples, or two or more independent peptides in a  
852 single IWF sample, were considered as reliable identification. Reversed hits were deleted  
853 from the MaxQuant results table, as were tomato and contamination hits.

854

### 855 **Identification of apoplastic ipiSSPs from *C. fulvum*.**

856 *C. fulvum* SSPs directed to the apoplastic environment via the classical/conventional  
857 secretory pathway (i.e. SSPs that possess an N-terminal signal peptide, but lack a GPI anchor  
858 modification site, a transmembrane domain, or a putative C-terminal ER retention/retention-  
859 like signal) were targeted for identification in the protein set identified by LC–MS/MS  
860 analysis. The SignalP v3.0 (Bendtsen et al., 2004) and v4.1 (Petersen et al., 2011) servers  
861 were used for signal peptide prediction, while the big-PI Fungal Predictor (Eisenhaber et al.,  
862 2004) and TMHMM v2.0 (Krogh et al., 2001) servers were used for the prediction of GPI  
863 anchor modification sites and transmembrane domains, respectively.

864 Pre-existing RNA-Seq transcriptome sequencing data (Mesarich et al., 2014) from a  
865 compatible *in planta* time course involving *C. fulvum* strain 0WU and *S. lycopersicum* cv.  
866 H-Cf-0 (4, 8 and 12 dpi), as well as from strain 0WU grown *in vitro* in PDB or Gamborg B5  
867 liquid media (4 dpi), were used to predict which of the SSPs identified by LC–MS/MS  
868 analysis are encoded by *in planta*-induced genes. Although these data lack biological  
869 replicates, they have been extensively validated through RT-qrtPCR experiments (Mesarich  
870 et al., 2014; this study). Paired-end RNA-Seq reads were re-mapped to the strain 0WU  
871 genome sequence (de Wit et al., 2012) with Bowtie v2-2.1.0 (Langmead and Salzberg, 2012)  
872 and TopHat v2.0.12 (Kim et al., 2013) using a custom script (Methods S1). Transcript  
873 assembly and abundance estimations were then performed using Cufflinks v2.0.2 (Trapnell et  
874 al., 2010), with transcript abundance expressed as FPKM values. SSPs were deemed to be *in*  
875 *planta*-induced if they were encoded by genes that had a maximum *in planta* FPKM value of  
876  $\geq 50$  at 4, 8 or 12 dpi that exceeded their maximum *in vitro* FPKM value at 4 dpi by a factor  
877 of  $\geq 1.5$ . Gene exon–intron boundaries were confirmed using the same RNA-Seq data.

878 **General homology screening and alignments.**

879 Reciprocal BLASTp screens (Altschul et al., 1997) were used to identify homologs of the  
880 apoplastic ipiSSPs from *C. fulvum* present in publicly available databases at NCBI and JGI  
881 (Grigoriev et al., 2011). In all cases, hits with an expect (E)-value of  $>1E-02$  were not  
882 considered. Likewise, proteins that did not have the same number of Cys residues as the  
883 query sequence were not considered. For those proteins for which a homolog could not be  
884 identified in JGI, a tBLASTn screen was carried out against the genome collection with the  
885 same E-value cut-off. Homologous proteins were aligned using the Clustal Omega server  
886 (Sievers et al., 2011).

887

888 **Motif identification.**

889 The MEME v4.11.2 server (Bailey et al., 2006) was used to identify short sequence motifs  
890 shared between members of the *C. fulvum* apoplastic ipiSSP set. For this purpose, the  
891 expected distribution of motif sites was set to any number of repetitions per sequence, the  
892 number of motifs to find was set to 100, the minimum and maximum length of motif was set  
893 to four and 10 amino acid residues, respectively, the minimum and maximum number of sites  
894 per motif was set to five and 100, respectively, and the location of motif sites was set to given  
895 strand only. All other settings were kept as default.

896

897 **Structural modelling.**

898 Three-dimensional protein structure prediction servers were used to infer possible structural  
899 relationships between apoplastic ipiSSPs of *C. fulvum* and proteins with characterized tertiary  
900 structures in the RCSB PDB (Berman et al., 2000). Only those ipiSSPs with no homology to  
901 proteins present in NCBI or JGI, or those with homology to hypothetical proteins of unknown  
902 function in these databases, were investigated. The prediction servers employed were  
903 HHPred (Hildebrand et al., 2009; Söding et al., 2005), SPARKS-X (Yang et al., 2011),  
904 MUSTER (Wu and Zhang, 2008), FFAS03/FFAS-3D (Jaroszewski et al., 2005; Xu et al.,  
905 2013), FUGUE v2.0 (Shi et al., 2001), RaptorX (Källberg et al., 2012), pGenTHREADER  
906 (Lobley et al., 2009), Phyre2 (Kelley et al., 2015) and I-TASSER (Zhang, 2008). Structural  
907 modelling was done with MODELLER (HHPred) (Webb and Sali, 2002) and RaptorX, and  
908 was visualized using PyMOL (DeLano, 2002). For each server, default settings were used.

909

910

911

912 **Repeat identification.**

913 BLASTn was used to identify repetitive nucleotide sequences shared between the genome  
914 scaffolds harbouring an *Ecp* gene and the rest of the *C. fulvum* strain 0WU genome. Only  
915 those sequence repeats of  $\geq 100$  nucleotides in length, and sharing  $\geq 80\%$  identity, with an  
916 E-value threshold of  $1E-05$ , were considered. The maximum total number of sequence  
917 alignments considered per scaffold was set to 5,000.

918

919 **Homology screening and expression profiling in *Dothistroma septosporum*.**

920 Reciprocal BLASTp and tBLASTn screens were used to identify homologs of the apoplastic  
921 ipiSSPs from *C. fulvum* in the *D. septosporum* strain NZE10 protein catalogue and genome  
922 (de Wit et al., 2012) at JGI, respectively, with hits possessing an E-value of  $>1E-02$  not  
923 considered. RNA-Seq data from *D. septosporum* strain NZE10 (Bradshaw et al., 2016) were  
924 used to determine which of the homologs are most relevant to the *D. septosporum*–*Pinus*  
925 *radiata* interaction. More specifically, transcript abundance data from one *in vitro* growth  
926 condition (fungal mycelia [FM] in *Dothistroma* liquid medium) and three *in planta* growth  
927 conditions (epiphytic/biotrophic [early], initial necrosis [mid] and mature sporulating lesion  
928 [late]), expressed as reads per million per kb (RPMK) values, were used. Genes deemed  
929 relevant to the interaction had to have a maximum *in planta* RNA-Seq RPMK value of  $\geq 50$  at  
930 the early, mid, or late time point. Furthermore, this value had to exceed the gene's *in vitro*  
931 RPMK value by a factor of at least 1.5.

932

933 **PVX-mediated transient expression assays.**

934 Tomato accessions (Table S3) were screened for their ability to recognize apoplastic ipiSSPs  
935 through the elicitation of an HR using the PVX-based transient expression system  
936 (Hammond-Kosack et al., 1995; Takken et al., 2000). For this purpose, the cDNA sequence  
937 encoding a mature ipiSSP was fused downstream of the cDNA sequence encoding the *N.*  
938 *tabacum* PR1A signal peptide (i.e. for secretion into the apoplastic environment), and cloned  
939 into the binary PVX vector pSfinx behind the *Cauliflower mosaic virus* (CaMV) 35S  
940 promoter (Takken et al., 2000). These steps were carried out using the protocol of Mesarich  
941 et al. (2014) (overlap extension PCR and restriction enzyme-mediated cloning) or Mesarich  
942 et al. (2016) (overlap extension PCR and GATEWAY cloning [Invitrogen]) with the primer  
943 pairs listed in Table S6. Constructs were transformed into *Agrobacterium tumefaciens* strain  
944 GV3101 for agroinfection of tomato by electroporation using the method of Takken et al.  
945 (2000). For localized transient expression assays in tomato, transformants were prepared

946 using the protocol described by Stergiopoulos et al. (2010), but with re-suspension in a final  
947 volume of 0.5 ml MMA-acetosyringone, and inoculated into fully expanded leaves by  
948 localized wounding on each side of the main vein with a toothpick (Luderer et al., 2002a;  
949 Takken et al., 2000). For systemic transient expression assays, transformants were again  
950 prepared using the method of Stergiopoulos et al. (2010), with final resuspension in MMA-  
951 acetosyringone to an OD<sub>600</sub> of 1.0, and infiltrated into both cotyledons of a seedling at 10 d  
952 post-germination with a 1-ml needleless syringe (Mesarich et al., 2014). The presence or  
953 absence of an HR was visually assessed at 10 d post-wounding and 3 weeks post-infiltration  
954 for systemic and localized transient expression assays, respectively.

955

### 956 **Tomato infection assays.**

957 Tomato accessions (Table S3) were inoculated with *C. fulvum* strain 2.4.5.9.11 IPO using the  
958 method described by Mesarich et al. (2014), with resistance or susceptibility to this strain  
959 visually assessed across three independent plants at 14 dpi.

960

### 961 **RT-qrtPCR gene expression analysis.**

962 Leaf samples from compatible *C. fulvum* strain 0WU–*S. lycopersicum* cv. H-Cf-0 interactions  
963 at 4, 8, 12 and 16 dpi, as well as fungal samples from *C. fulvum* strain 0WU PDB and  
964 Gamborg B5 liquid media cultures at 4 dpi, were collected by Mesarich et al. (2014) and  
965 stored at –80°C. Total RNA extraction from each sample, as well as subsequent cDNA  
966 synthesis, was carried out according to the protocol of Griffiths et al. (2017). RT-qrtPCR  
967 experiments were performed on cDNA samples using the method described by Ökmen et al.  
968 (2013) and the primers listed in Table S6. The *C. fulvum actin* gene was targeted as a  
969 reference for normalization of gene expression, and results were analysed according to the 2<sup>-</sup>  
970  $\Delta Ct$  method (Livak and Schmittgen, 2001). Results were the average of three biological  
971 replicates.

972

### 973 **Allelic variation analysis.**

974 *C. fulvum* strains (Table S5) were grown in PDB, with conidia preparation, PDB inoculation,  
975 and culture conditions identical to that described by Mesarich et al. (2014). Genomic DNA  
976 was extracted from each strain according to the method of van Kan et al. (1991). Genes  
977 targeted for an analysis of allelic variation were amplified from genomic DNA by PCR using  
978 the protocol and reagents described by Mesarich et al. (2014), and the primers listed in Table  
979 S6. PCR amplicons were purified using an illustra GFX PCR DNA and Gel Band Purification

980 Kit (GE Healthcare), and were directly sequenced at MacroGen Inc. (Korea) using the same  
981 gene-specific primers employed for PCR amplification.

982

### 983 **ACKNOWLEDGEMENTS**

984 We thank Simon Williams (Australian National University, Canberra, Australia) for advice  
985 on protein structure prediction, Andre Sim (Massey University, Palmerston North) for  
986 mapping RNA-Seq reads to the *D. septosporum* genome, Sjef Boeren (Wageningen  
987 University, the Netherlands) for performing LC-MS/MS experiments, and Willem van  
988 Dooijeweert (Centre for Genetic Resources, the Netherlands) for providing tomato seed.  
989 Financial assistance for this research was provided by Wageningen University, the Royal  
990 Netherlands Academy of Arts and Sciences, European Research Area-Plant Genomics, the  
991 Centre for BioSystems Genomics (part of the Netherlands Genomics Initiative/Netherlands  
992 Organization for Scientific Research; project TD8-35), and the New Zealand Bio-Protection  
993 Research Centre. Financial assistance for CW was provided by the Chinese Scholarship  
994 Council. The authors declare no conflicts of interest.

995

### 996 **AUTHOR CONTRIBUTIONS**

997 CHM, BÖ, REB, MDT and PJGMdW conceived the project. CHM, CHD and  
998 AvdB performed the bioinformatic analyses. CHM, BÖ, HR, SAG, CW, MKJ, AM, JC, LH  
999 and HGB carried out the experimental work. CHM wrote the manuscript. All authors read  
1000 and approved the final manuscript.

1001

### 1002 **LITERATURE CITED**

- 1003 Allen, A., Chatt, E., and Smith, T.J. 2013a. The atomic structure of the virally encoded  
1004 antifungal protein, KP6. *J. Mol. Biol.* 425:609-621.
- 1005 Allen, A., Islamovic, E., Kaur, J., Gold, S., Shah, D., and Smith, T.J. 2013b. The virally  
1006 encoded killer proteins from *Ustilago maydis*. *Fungal Biol. Rev.* 26:166-173.
- 1007 Altschul, S.F., Madden, T.L., Schäffer, A.A., Zhang, J., Zhang, Z., Miller, W., and Lipman,  
1008 D.J. 1997. Gapped BLAST and PSI-BLAST: a new generation of protein database  
1009 search programs. *Nucleic Acids Res.* 25:3389-3402.
- 1010 Antuch, W., Guntert, P., and Wuthrich, K. 1996. Ancestral beta gamma-crystallin precursor  
1011 structure in a yeast killer toxin. *Nat. Struct. Biol.* 3:662-665.
- 1012 Asiegbu, F.O., Choi, W., Li, G., Nahalkova, J., and Dean, R.A. 2003. Isolation of a novel  
1013 antimicrobial peptide gene (Sp-AMP) homologue from *Pinus sylvestris* (Scots pine)

- 1014 following infection with the root rot fungus *Heterobasidion annosum*. FEMS  
1015 Microbiol. Lett. 228:27-31.
- 1016 Baccelli, I., Luti, S., Bernardi, R., Scala, A., and Pazzagli, L. 2014. Cerato-platanin shows  
1017 expansin-like activity on cellulosic materials. Appl. Microbiol. Biotechnol. 98:175-  
1018 184.
- 1019 Bailey, T.L., Williams, N., Misleh, C., and Li, W.W. 2006. MEME: discovering and  
1020 analyzing DNA and protein sequence motifs. Nucleic Acids Res. 34:W369-373.
- 1021 Bendtsen, J.D., Nielsen, H., von Heijne, G., and Brunak, S. 2004. Improved prediction of  
1022 signal peptides: SignalP 3.0. J. Mol. Biol. 340:783-795.
- 1023 Berman, H.M., Westbrook, J., Feng, Z., Gilliland, G., Bhat, T.N., Weissig, H., Shindyalov,  
1024 I.N., and Bourne, P.E. 2000. The protein data bank. Nucleic Acids Res. 28:235-242.
- 1025 Blundell, T., Lindley, P., Miller, L., Moss, D., Slingsby, C., Tickle, I., Turnell, B., and  
1026 Wistow, G. 1981. The molecular structure and stability of the eye lens: X-ray analysis  
1027 of  $\gamma$ -crystallin II. Nature 289:771-777.
- 1028 Boddi, S., Comparini, C., Calamassi, R., Pazzagli, L., Cappugi, G., and Scala, A. 2004.  
1029 Cerato-platanin protein is located in the cell walls of ascospores, conidia and hyphae  
1030 of *Ceratocystis fimbriata* f. sp. *platani*. FEMS Microbiol. Lett. 233:341-346.
- 1031 Bolton, M.D., van Esse, H.P., Vossen, J.H., de Jonge, R., Stergiopoulos, I., Stulemeijer,  
1032 I.J.E., van den Berg, G.C.M., Borrás-Hidalgo, O., Dekker, H.L., de Koster, C.G., de  
1033 Wit, P.J.G.M., Joosten, M.H.A.J., and Thomma, B.P.H.J. 2008. The novel  
1034 *Cladosporium fulvum* lysin motif effector Ecp6 is a virulence factor with orthologues  
1035 in other fungal species. Mol. Microbiol. 69:119-136.
- 1036 Bradshaw, R.E., Guo, Y., Sim, A.D., Kabir, M.S., Chettri, P., Ozturk, I.K., Hunziker, L.,  
1037 Ganley, R.J., and Cox, M.P. 2016. Genome-wide gene expression dynamics of the  
1038 fungal pathogen *Dothistroma septosporum* throughout its infection cycle of the  
1039 gymnosperm host *Pinus radiata*. Mol. Plant Pathol. 17:210-224.
- 1040 Chen, H., Kovalchuk, A., Keriö, S., and Asiegbu, F.O. 2013. Distribution and bioinformatic  
1041 analysis of the cerato-platanin protein family in *Dikarya*. Mycologia 105:1479-1488.
- 1042 Chruszcz, M., Chapman, M.D., Osinski, T., Solberg, R., Demas, M., Porebski, P.J., Majorek,  
1043 K.A., Pomes, A., and Minor, W. 2012. *Alternaria alternata* allergen Alt a 1: a unique  
1044 beta-barrel protein dimer found exclusively in fungi. J. Allergy Clin. Immunol.  
1045 130:241-247 e249.
- 1046 Cook, D.E., Mesarich, C.H., and Thomma, B.P. 2015. Understanding plant immunity as a  
1047 surveillance system to detect invasion. Annu. Rev. Phytopathol. 53:541-563.

- 1048 Cooke, M. 1883. New American fungi. *Grevillea* 12:22-33.
- 1049 Cox, J., and Mann, M. 2008. MaxQuant enables high peptide identification rates,  
1050 individualized p.p.b.-range mass accuracies and proteome-wide protein quantification.  
1051 *Nat. Biotechnol.* 26:1367-1372.
- 1052 Cox, J., Neuhauser, N., Michalski, A., Scheltema, R.A., Olsen, J.V., and Mann, M. 2011.  
1053 Andromeda: a peptide search engine integrated into the MaxQuant environment. *J.*  
1054 *Proteome Res.* 10:1794-1805.
- 1055 de Guillen, K., Ortiz-Vallejo, D., Gracy, J., Fournier, E., Kroj, T., and Padilla, A. 2015.  
1056 Structure analysis uncovers a highly diverse but structurally conserved effector family  
1057 in phytopathogenic fungi. *PLoS Pathog.* 11:e1005228.
- 1058 de Jonge, R., Peter van Esse, H., Kombrink, A., Shinya, T., Desaki, Y., Bours, R., van der  
1059 Krol, S., Shibuya, N., Joosten, M.H.A.J., and Thomma, B.P.H.J. 2010. Conserved  
1060 fungal LysM effector Ecp6 prevents chitin-triggered immunity in plants. *Science*  
1061 329:953-955.
- 1062 de O. Barsottini, M.R., de Oliveira, J.F., Adamoski, D., Teixeira, P.J., do Prado, P.F., Tiezzi,  
1063 H.O., Sforça, M.L., Cassago, A., Portugal, R.V., and de Oliveira, P.S. 2013.  
1064 Functional diversification of cerato-platanins in *Moniliophthora perniciosa* as seen by  
1065 differential expression and protein function specialization. *Mol. Plant Microbe*  
1066 *Interact.* 26:1281-1293.
- 1067 de Oliveira, A.L., Gallo, M., Pazzagli, L., Benedetti, C.E., Cappugi, G., Scala, A., Pantera,  
1068 B., Spisni, A., Pertinhez, T.A., and Cicero, D.O. 2011. The structure of the elicitor  
1069 cerato-platanin (CP), the first member of the CP fungal protein family, reveals a  
1070 double  $\psi\beta$ -barrel fold and carbohydrate binding. *J. Biol. Chem.* 286:17560-17568.
- 1071 de Vouge, M., Thaker, A., A Curran, I., Zhang, L., Muradia, G., Rode, H., and Vijay, H.  
1072 1996. Isolation and expression of a cDNA clone encoding an *Alternaria alternata* Alt  
1073 a 1 subunit. *Int. Arch. Allergy Immunol.* 111:385-395.
- 1074 de Wit, P.J.G.M., and Spikman, G. 1982. Evidence for the occurrence of race and cultivar-  
1075 specific elicitors of necrosis in intercellular fluids of compatible interactions of  
1076 *Cladosporium fulvum* and tomato. *Physiol. Plant Pathol.* 21:1-11.
- 1077 de Wit, P.J.G.M., Joosten, M.H.A.J., Thomma, B.P.H.J., and Stergiopoulos, I. 2009. Gene for  
1078 gene models and beyond: the *Cladosporium fulvum*-tomato pathosystem. Pages 135-  
1079 156 in: *Plant Relationships*, H.B. Deising, ed. Springer, Berlin Heidelberg.
- 1080 de Wit, P.J.G.M., van der Burgt, A., Ökmen, B., Stergiopoulos, I., Abd-Elsalam, K.A., Aerts,  
1081 A.L., Bahkali, A.H., Beenen, H.G., Chettri, P., Cox, M.P., Datema, E., de Vries, R.P.,



- 1082 Dhillon, B., Ganley, A.R., Griffiths, S.A., Guo, Y., Hamelin, R.C., Henrissat, B.,  
1083 Kabir, M.S., Karimi Jashni, M., Kema, G., Klaubauf, S., Lapidus, A., Levasseur, A.,  
1084 Lindquist, E., Mehrabi, R., Ohm, R.A., Owen, T.J., Salamov, A., Schwelm, A.,  
1085 Schijlen, E., Sun, H., van den Burg, H.A., van Ham, R.C.H.J., Zhang, S., Goodwin,  
1086 S.B., Grigoriev, I.V., Collemare, J., and Bradshaw, R.E. 2012. The genomes of the  
1087 fungal plant pathogens *Cladosporium fulvum* and *Dothistroma septosporum* reveal  
1088 adaptation to different hosts and lifestyles but also signatures of common ancestry.  
1089 PLoS Genet. 8:e1003088.
- 1090 DeLano, W.L. 2002. The PyMOL molecular graphics system. DeLano Scientific, Palo Alto,  
1091 CA, U.S.A.
- 1092 Deng, C.H., Plummer, K.M., Jones, D.A.B., Mesarich, C.H., Shiller, J., Taranto, A.P.,  
1093 Robinson, A.J., Kastner, P., Hall, N.E., Templeton, M.D., and Bowen, J.K. 2017.  
1094 Comparative analysis of the predicted secretomes of Rosaceae scab pathogens  
1095 *Venturia inaequalis* and *V. pirina* reveals expanded effector families and putative  
1096 determinants of host range. BMC Genomics 18:339.
- 1097 Dixon, M.S., Hatzixanthis, K., Jones, D.A., Harrison, K., and Jones, J.D.G. 1998. The tomato  
1098 *Cf-5* disease resistance gene and six homologs show pronounced allelic variation in  
1099 leucine-rich repeat copy number. Plant Cell 10:1915-1925.
- 1100 Dixon, M.S., Jones, D.A., Keddie, J.S., Thomas, C.M., Harrison, K., and Jones, J.D.G. 1996.  
1101 The tomato *Cf-2* disease resistance locus comprises two functional genes encoding  
1102 leucine-rich repeat proteins. Cell 84:451-459.
- 1103 Domazakis, E., Lin, X., Aguilera-Galvez, C., Wouters, D., Bijsterbosch, G., Wolters, P.J.,  
1104 and Vleeshouwers, V.G.A.A. 2017. Effectoromics-based identification of cell surface  
1105 receptors in potato. Pages 337-353 in: Plant Pattern Recognition Receptors: Methods  
1106 and Protocols, L. Shan and P. He, eds. Springer New York, New York, NY.
- 1107 Du, J., and Vleeshouwers, V.G.A.A. 2014. The do's and don'ts of effectoromics. Pages 257-  
1108 268 in: Plant-Pathogen Interactions: Methods and Protocols, P. Birch, T.J. Jones, and  
1109 I.B.J. Bos, eds. Humana Press, Totowa, NJ.
- 1110 Eisenhaber, B., Schneider, G., Wildpaner, M., and Eisenhaber, F. 2004. A sensitive predictor  
1111 for potential GPI lipid modification sites in fungal protein sequences and its  
1112 application to genome-wide studies for *Aspergillus nidulans*, *Candida albicans*,  
1113 *Neurospora crassa*, *Saccharomyces cerevisiae* and *Schizosaccharomyces pombe*. J.  
1114 Mol. Biol. 337:243-253.

- 1115 Finkler, A., Peery, T., Tao, J., and Bruenn, J. 1992. Immunity and resistance to the KP6 toxin  
1116 of *Ustilago maydis*. *Molec. Gen. Genet.* 233:395-403.
- 1117 Frías, M., González, C., and Brito, N. 2011. BcSpl1, a cerato-platanin family protein,  
1118 contributes to *Botrytis cinerea* virulence and elicits the hypersensitive response in the  
1119 host. *New Phytol.* 192:483-495.
- 1120 Frías, M., Brito, N., González, M., and González, C. 2014. The phytotoxic activity of the  
1121 cerato-platanin BcSpl1 resides in a two-peptide motif on the protein surface. *Mol.*  
1122 *Plant Pathol.* 15:342-351.
- 1123 Frischmann, A., Neudl, S., Gaderer, R., Bonazza, K., Zach, S., Gruber, S., Spadiut, O.,  
1124 Friedbacher, G., Grothe, H., and Seidl-Seiboth, V. 2013. Self-assembly at air/water  
1125 interfaces and carbohydrate binding properties of the small secreted protein EPL1  
1126 from the fungus *Trichoderma atroviride*. *J. Biol. Chem.* 288:4278-4287.
- 1127 Garrido-Arandia, M., Bretones, J., Gómez-Casado, C., Cubells, N., Díaz-Perales, A., and  
1128 Pacios, L.F. 2016a. Computational study of pH-dependent oligomerization and ligand  
1129 binding in Alt a 1, a highly allergenic protein with a unique fold. *J. Comput. Aided*  
1130 *Mol. Des.* 30:365-379.
- 1131 Garrido-Arandia, M., Silva-Navas, J., Ramírez-Castillejo, C., Cubells-Baeza, N., Gómez-  
1132 Casado, C., Barber, D., Pozo, J.C., Melendi, P.G., Pacios, L.F., and Díaz-Perales, A.  
1133 2016b. Characterisation of a flavonoid ligand of the fungal protein Alt a 1. *Sci. Rep.*  
1134 6.
- 1135 Gómez-Casado, C., Murua-García, A., Garrido-Arandia, M., González-Melendi, P., Sánchez-  
1136 Monge, R., Barber, D., Pacios, L.F., and Díaz-Perales, A. 2014. Alt a 1 from  
1137 *Alternaria* interacts with PR5 thaumatin-like proteins. *FEBS Lett.* 588:1501-1508.
- 1138 Griffiths, S., Mesarich, C.H., Overdijk, E., Saccomanno, B., de Wit, P.J.G.M., and  
1139 Collemare, J. 2017. Down-regulation of fungal secondary metabolite biosynthesis is  
1140 required for biotrophic pathogenesis of *Cladosporium fulvum* on tomato. *Mol. Plant*  
1141 *Pathol.* DOI: 10.1111/mpp.12527.
- 1142 Grigoriev, I.V., Nordberg, H., Shabalov, I., Aerts, A., Cantor, M., Goodstein, D., Kuo, A.,  
1143 Minovitsky, S., Nikitin, R., Ohm, R.A., Ollilar, R., Poliakov, A., Ratnere, I., Riley,  
1144 R., Smirnova, T., Rokhsar, D., and Dubchak, I. 2011. The genome portal of the  
1145 Department of Energy Joint Genome Institute. *Nucleic Acids Res.* 42:D26-31.

- 1146 Hamlyn, P.F., Bradshaw, R.E., Mellon, F.M., Santiago, C.M., Wilson, J.M., and Peberdy, J.F.  
1147 1981. Efficient protoplast isolation from fungi using commercial enzymes. *Enzyme*  
1148 *Microb. Technol.* 3:321-325.
- 1149 Hammond-Kosack, K.E., Staskawicz, B.J., Jones, J.D.G., and Baulcombe, D.C. 1995.  
1150 Functional expression of a fungal avirulence gene from a modified potato virus X  
1151 genome. *Mol. Plant Microbe Interact.* 8:181-185.
- 1152 Heath, M.C. 2000. Hypersensitive response-related death. Pages 77-90 in: *Programmed Cell*  
1153 *Death in Higher Plants*, Springer.
- 1154 Helenius, A., and Aebi, M. 2001. Intracellular functions of N-linked glycans. *Science*  
1155 291:2364-2369.
- 1156 Hildebrand, A., Remmert, M., Biegert, A., and Söding, J. 2009. Fast and accurate automatic  
1157 structure prediction with HHpred. *Proteins* 77 Suppl 9:128-132.
- 1158 Hubbeling, N. 1978. Breakdown of resistance of the *Cf5* gene in tomato by another new race  
1159 of *Fulvia fulva*. *Meded. Fac. Landbouwwet. Rijksuniv. Gent* 43:891-894.
- 1160 Hunziker, L., Mesarich, C.H., McDougal, R.L., and Bradshaw, R.E. 2016. Effector  
1161 identification in the pine pathogen *Dothistroma septosporum*. *N. Z. Plant Prot.* 69:94-  
1162 98.
- 1163 Iida, Y., van 't Hof, P., Beenen, H., Mesarich, C., Kubota, M., Stergiopoulos, I., Mehrabi, R.,  
1164 Notsu, A., Fujiwara, K., Bahkali, A., Abd-Elsalam, K., Collemare, J., and de Wit,  
1165 P.J.G.M. 2015. Novel mutations detected in avirulence genes overcoming tomato *Cf*  
1166 resistance genes in isolates of a Japanese population of *Cladosporium fulvum*. *PloS*  
1167 *one* 10:e0123271.
- 1168 Jaroszewski, L., Rychlewski, L., Li, Z., Li, W., and Godzik, A. 2005. FFAS03: a server for  
1169 profile-profile sequence alignments. *Nucleic Acids Res.* 33:W284-288.
- 1170 Karimi Jashni, M, Dols, I.H.M., Iida, Y., Boeren, S., Beenen, H.G., Mehrabi, R., Collemare,  
1171 J., and de Wit, P.J.G.M. 2015. Synergistic action of a metalloprotease and a serine  
1172 protease from *Fusarium oxysporum* f. sp. *lycopersici* cleaves chitin-binding tomato  
1173 chitinases, reduces their antifungal activity, and enhances fungal virulence. *Mol. Plant*  
1174 *Microbe Interact.* 28:996-1008.
- 1175 Jenkins, J. 1948. The origin of the cultivated tomato. *Econ. Bot.* 2:379-392.
- 1176 Jeong, J.S., Mitchell, T.K., and Dean, R.A. 2007. The *Magnaporthe grisea* snodprot1  
1177 homolog, MSP1, is required for virulence. *FEMS Microbiol. Lett.* 273:157-165.

- 1178 Jones, D.A., Thomas, C.M., Hammond-Kosack, K.E., Balint-Kurti, P.J., and Jones, J.D.  
1179 1994. Isolation of the tomato *Cf-9* gene for resistance to *Cladosporium fulvum* by  
1180 transposon tagging. *Science* 266:789-793.
- 1181 Joosten, M.H., Vogelsang, R., Cozijnsen, T.J., Verberne, M.C., and de Wit, P.J. 1997. The  
1182 biotrophic fungus *Cladosporium fulvum* circumvents Cf-4-mediated resistance by  
1183 producing unstable AVR4 elicitors. *Plant Cell* 9:367-379.
- 1184 Joosten, M.H.A.J. 2012. Isolation of apoplastic fluid from leaf tissue by the vacuum  
1185 infiltration-centrifugation technique. Pages 603-610 in: *Plant Fungal Pathogens*, M.D.  
1186 Bolton and B.P.H.J. Thomma, eds. Humana Press.
- 1187 Joosten, M.H.A.J., Cozijnsen, T.J., and de Wit, P.J.G.M. 1994. Host resistance to a fungal  
1188 tomato pathogen lost by a single base-pair change in an avirulence gene. *Nature*  
1189 367:384-386.
- 1190 Källberg, M., Wang, H., Wang, S., Peng, J., Wang, Z., Lu, H., and Xu, J. 2012. Template-  
1191 based protein structure modeling using the RaptorX web server. *Nat. Protocols*  
1192 7:1511-1522.
- 1193 Kappé, G., Purkiss, A.G., van Genesen, S.T., Slingsby, C., and Lubsen, N.H. 2010. Explosive  
1194 expansion of  $\beta\gamma$ -crystallin genes in the ancestral vertebrate. *J. Mol. Evol.* 71:219-230.
- 1195 Kelley, L.A., Mezulis, S., Yates, C.M., Wass, M.N., and Sternberg, M.J.E. 2015. The Phyre2  
1196 web portal for protein modeling, prediction and analysis. *Nat. Protocols* 10:845-858.
- 1197 Kerr, E.A., and Bailey, D.L. 1964. Resistance to *Cladosporium fulvum* Cke. obtained from  
1198 wild species of tomato. *Can. J. Bot.* 42:1541-1554.
- 1199 Kerr, E.A., Patrick, Z.A., and Bailey, D.L. 1971. Resistance in tomato species to new races of  
1200 leaf mold (*Cladosporium fulvum* Cke.) *Hortic. Res.* 11:84-92.
- 1201 Kim, D., Perteza, G., Trapnell, C., Pimentel, H., Kelley, R., and Salzberg, S.L. 2013. TopHat2:  
1202 accurate alignment of transcriptomes in the presence of insertions, deletions and gene  
1203 fusions. *Genome Biol.* 14:R36.
- 1204 Kim, S., Ahn, I.-P., Rho, H.-S., and Lee, Y.-H. 2005. MHP1, a *Magnaporthe grisea*  
1205 hydrophobin gene, is required for fungal development and plant colonization. *Mol.*  
1206 *Microbiol.* 57:1224-1237.
- 1207 Kohler, A.C., Chen, L.-H., Hurlburt, N., Salvucci, A., Schwessinger, B., Fisher, A.J., and  
1208 Stergiopoulos, I. 2016. Structural analysis of an Avr4 effector ortholog offers insight  
1209 into chitin binding and recognition by the Cf-4 receptor. *Plant Cell* 28:1945-1965.
- 1210 Koltin, Y., and Day, P. 1975. Specificity of *Ustilago maydis* killer proteins. *Appl. Microbiol.*  
1211 30:694.

- 1212 Koltin, Y., and Day, P. 1976. Inheritance of killer phenotypes and double-stranded RNA in  
1213 *Ustilago maydis*. Proc. Natl. Acad. Sci. 73:594-598.
- 1214 Krogh, A., Larsson, B., von Heijne, G., and Sonnhammer, E.L. 2001. Predicting  
1215 transmembrane protein topology with a hidden Markov model: application to  
1216 complete genomes. J. Mol. Biol. 305:567-580.
- 1217 Krüger, J., Thomas, C.M., Golstein, C., Dixon, M.S., Smoker, M., Tang, S., Mulder, L., and  
1218 Jones, J.D. 2002. A tomato cysteine protease required for *Cf-2*-dependent disease  
1219 resistance and suppression of autonecrosis. Science 296:744-747.
- 1220 Kruijt, M., Kip, D.J., Joosten, M.H., Brandwagt, B.F., and de Wit, P.J. 2005. The *Cf-4* and  
1221 *Cf-9* resistance genes against *Cladosporium fulvum* are conserved in wild tomato  
1222 species. Mol. Plant Microbe Interact. 18:1011-1021.
- 1223 Langmead, B., and Salzberg, S.L. 2012. Fast gapped-read alignment with Bowtie 2. Nature  
1224 Methods 9:357-359.
- 1225 Laterrot, H. 1986. Race 2.5.9, a new race of *Cladosporium fulvum* (*Fulvia fulva*) and sources  
1226 of resistance in tomato. Neth. J. Plant Pathol. 92:305-307.
- 1227 Laugé, R., Goodwin, P.H., de Wit, P.J.G.M., and Joosten, M.H.A.J. 2000. Specific HR-  
1228 associated recognition of secreted proteins from *Cladosporium fulvum* occurs in both  
1229 host and non-host plants. Plant J. 23:735-745.
- 1230 Laugé, R., Joosten, M.H.A.J., van den Ackerveken, G.F.J.M., van den Broek, H.W.J., and de  
1231 Wit, P.J.G.M. 1997. The *in planta*-produced extracellular proteins ECP1 and ECP2 of  
1232 *Cladosporium fulvum* are virulence factors. Mol. Plant Microbe Interact. 10:725-734.
- 1233 Laugé, R., Joosten, M.H., Haanstra, J.P., Goodwin, P.H., Lindhout, P., and de Wit, P.J. 1998.  
1234 Successful search for a resistance gene in tomato targeted against a virulence factor of  
1235 a fungal pathogen. Proc. Natl. Acad. Sci. 95:9014-9018.
- 1236 Lee, H.A., Kim, S.Y., Oh, S.K., Yeom, S.I., Kim, S.B., Kim, M.S., Kamoun, S., and Choi, D.  
1237 2014. Multiple recognition of RXLR effectors is associated with nonhost resistance of  
1238 pepper against *Phytophthora infestans*. New Phytol. 203:926-938.
- 1239 Li, N., Erman, M., Pangborn, W., Duax, W.L., Park, C.M., Bruenn, J., and Ghosh, D. 1999.  
1240 Structure of *Ustilago maydis* killer toxin KP6 alpha-subunit. A multimeric assembly  
1241 with a central pore. J. Biol. Chem. 274:20425-20431.
- 1242 Li, S., Zhao, T., Li, H., Xu, X., and Li, J. 2015. First report of races 2.5 and 2.4.5 of  
1243 *Cladosporium fulvum* (syn. *Passalora fulva*), causal fungus of tomato leaf mold  
1244 disease in China. J. Gen. Plant Pathol. 81:162-165.

- 1245 Livak, K.J., and Schmittgen, T.D. 2001. Analysis of relative gene expression data using real-  
1246 time quantitative PCR and the  $2^{-\Delta\Delta C_T}$  method. *Methods* 25:402–408.
- 1247 Lobley, A., Sadowski, M.I., and Jones, D.T. 2009. pGenTHREADER and  
1248 pDomTHREADER: new methods for improved protein fold recognition and  
1249 superfamily discrimination. *Bioinformatics* 25:1761-1767.
- 1250 Lu, J., Boeren, S., de Vries, S.C., van Valenberg, H.J., Vervoort, J., and Hettinga, K. 2011.  
1251 Filter-aided sample preparation with dimethyl labeling to identify and quantify milk  
1252 fat globule membrane proteins. *J. Proteomics* 75:34-43.
- 1253 Luderer, R., Takken, F.L.W., de Wit, P.J.G.M., and Joosten, M.H.A.J. 2002a. *Cladosporium*  
1254 *fulvum* overcomes *Cf-2*-mediated resistance by producing truncated AVR2 elicitor  
1255 proteins. *Mol. Microbiol.* 45:875-884.
- 1256 Luderer, R., de Kock, M.J., Dees, R.H., de Wit, P.J., and Joosten, M.H. 2002b. Functional  
1257 analysis of cysteine residues of ECP elicitor proteins of the fungal tomato pathogen  
1258 *Cladosporium fulvum*. *Mol. Plant Pathol.* 3:91-95.
- 1259 Marcus, J.P., Goulter, K.C., Green, J.L., Harrison, S.J., and Manners, J.M. 1997. Purification,  
1260 characterisation and cDNA cloning of an antimicrobial peptide from *Macadamia*  
1261 *Integrifolia*. *Eur. J. Biochemistry* 244:743-749.
- 1262 May, M.J., Hammond-Kosack, K.E., and Jones, J.D. 1996. Involvement of reactive oxygen  
1263 species, glutathione metabolism, and lipid peroxidation in the *Cf*-gene-dependent  
1264 defense response of tomato cotyledons induced by race-specific elicitors of  
1265 *Cladosporium fulvum*. *Plant Physiol.* 110:1367-1379.
- 1266 McManus, A.M., Nielsen, K.J., Marcus, J.P., Harrison, S.J., Green, J.L., Manners, J.M., and  
1267 Craik, D.J. 1999. MiAMP1, a novel protein from *Macadamia integrifolia* adopts a  
1268 Greek key beta-barrel fold unique amongst plant antimicrobial proteins. *J. Mol. Biol.*  
1269 293:629-638.
- 1270 Melin, P., Schnurer, J., and Wagner, E.G. 2003. Characterization of *phiA*, a gene essential for  
1271 phialide development in *Aspergillus nidulans*. *Fungal Genet. Biol.* 40:234-241.
- 1272 Mesarich, C.H., Bowen, J.K., Hamiaux, C., and Templeton, M.D. 2015. Repeat-containing  
1273 protein effectors of plant-associated organisms. *Front. Plant Sci.* 6:872.
- 1274 Mesarich, C.H., Griffiths, S.A., van der Burgt, A., Ökmen, B., Beenen, H.G., Etalo, D.W.,  
1275 Joosten, M.H.A.J., and de Wit, P.J.G.M. 2014. Transcriptome sequencing uncovers  
1276 the *Avr5* avirulence gene of the tomato leaf mold pathogen *Cladosporium fulvum*.  
1277 *Mol. Plant Microbe Interact.* 27:846-857.

- 1278 Mesarich, C.H., Stergiopoulos, I., Beenen, H.G., Cordovez, V., Guo, Y., Karimi Jashni, M.,  
1279 Bradshaw, R.E., and de Wit, P.J.G.M. 2016. A conserved proline residue in  
1280 Dothideomycete Avr4 effector proteins is required to trigger a Cf-4-dependent  
1281 hypersensitive response. *Mol. Plant Pathol.* 17:84-95.
- 1282 Mishra, A., Krishnan, B., Srivastava, S.S., and Sharma, Y. 2014. Microbial  $\beta$ -crystallins.  
1283 *Prog. Biophys. Mol. Biol.* 115:42-51.
- 1284 Nielsen, P.S., Clark, A.J., Oliver, R.P., Huber, M., and Spanu, P.D. 2001. HCf-6, a novel  
1285 class II hydrophobin from *Cladosporium fulvum*. *Microbiol. Res.* 156:59-63.
- 1286 Ohtaki, S., Maeda, H., Takahashi, T., Yamagata, Y., Hasegawa, F., Gomi, K., Nakajima, T.,  
1287 and Abe, K. 2006. Novel hydrophobic surface binding protein, HsbA, produced by  
1288 *Aspergillus oryzae*. *Appl. Environ. Microbiol.* 72:2407-2413.
- 1289 Ökmen, B., Etalo, D.W., Joosten, M.H.A.J., Bouwmeester, H.J., de Vos, R.C.H., Collemare,  
1290 J., and de Wit, P.J.G.M. 2013. Detoxification of  $\alpha$ -tomatine by *Cladosporium fulvum*  
1291 is required for full virulence on tomato. *New Phytol.* 198:1203-1214.
- 1292 Panter, S.N., Hammond-Kosack, K.E., Harrison, K., Jones, J.D.G., and Jones, D.A. 2002.  
1293 Developmental control of promoter activity is not responsible for mature onset of Cf-  
1294 9B-mediated resistance to leaf mold in tomato. *Mol. Plant Microbe Interact.* 15:1099-  
1295 1107.
- 1296 Pazzagli, L., Cappugi, G., Manao, G., Camici, G., Santini, A., and Scala, A. 1999.  
1297 Purification, characterization, and amino acid sequence of cerato-platanin, a new  
1298 phytotoxic protein from *Ceratocystis fimbriata* f. sp. *platani*. *J. Biol. Chem.*  
1299 274:24959-24964.
- 1300 Peery, T., Shabat-Brand, T., Steinlauf, R., Koltin, Y., and Bruenn, J. 1987. Virus-encoded  
1301 toxin of *Ustilago maydis*: two polypeptides are essential for activity. *Mol. Cell. Biol.*  
1302 7:470-477.
- 1303 Peralta, I.E., and Spooner, D.M. 2006. History, origin and early cultivation of tomato  
1304 (Solanaceae). *Genetic Improvement of Solanaceous Crops* 2:1-27.
- 1305 Petersen, T.N., Brunak, S., von Heijne, G., and Nielsen, H. 2011. SignalP 4.0: discriminating  
1306 signal peptides from transmembrane regions. *Nature Methods* 8:785-786.
- 1307 Plissonneau, C., Daverdin, G., Ollivier, B., Blaise, F., Degrave, A., Fudal, I., Rouxel, T., and  
1308 Balesdent, M.H. 2016. A game of hide and seek between avirulence genes *AvrLm4-7*  
1309 and *AvrLm3* in *Leptosphaeria maculans*. *New Phytol.* 209:1613-1624.
- 1310 Puhalla, J.E. 1968. Compatibility reactions on solid medium and interstrain inhibition in  
1311 *Ustilago maydis*. *Genetics* 60:461.

- 1312 Quarantin, A., Glasenapp, A., Schäfer, W., Favaron, F., and Sella, L. 2016. Involvement of  
1313 the *Fusarium graminearum* cerato-platanin proteins in fungal growth and plant  
1314 infection. *Plant Physiol. Biochem.* 109:220-229.
- 1315 Rockwell, N.C., Krysan, D.J., Komiyama, T., and Fuller, R.S. 2002. Precursor processing by  
1316 kex2/furin proteases. *Chem. Rev.* 102:4525-4548.
- 1317 Rooney, H.C., van't Klooster, J.W., van der Hoorn, R.A., Joosten, M.H., Jones, J.D., and de  
1318 Wit, P.J. 2005. *Cladosporium Avr2* inhibits tomato Rcr3 protease required for Cf-2–  
1319 dependent disease resistance. *Science* 308:1783-1786.
- 1320 Rovenich, H., Boshoven, J.C., and Thomma, B.P. 2014. Filamentous pathogen effector  
1321 functions: of pathogens, hosts and microbiomes. *Curr. Opin. Plant Biol.* 20:96-103.
- 1322 Sánchez-Vallet, A., Saleem-Batcha, R., Kombrink, A., Hansen, G., Valkenburg, D.J.,  
1323 Thomma, B.P., and Mesters, J.R. 2013. Fungal effector Ecp6 outcompetes host  
1324 immune receptor for chitin binding through intrachain LysM dimerization. *eLife*  
1325 2:e00790.
- 1326 Seear, P.J., and Dixon, M.S. 2003. Variable leucine-rich repeats of tomato disease resistance  
1327 genes Cf-2 and Cf-5 determine specificity. *Mol. Plant Pathol.* 4:199-202.
- 1328 Segers, G.C., Hamada, W., Oliver, R.P., and Spanu, P.D. 1999. Isolation and characterisation  
1329 of five different hydrophobin-encoding cDNAs from the fungal tomato pathogen  
1330 *Cladosporium fulvum*. *Mol. Gen. Genet.* 261:644-652.
- 1331 Shabab, M., Shindo, T., Gu, C., Kaschani, F., Pansuriya, T., Chintla, R., Harzen, A., Colby,  
1332 T., Kamoun, S., and van der Hoorn, R.A. 2008. Fungal effector protein AVR2 targets  
1333 diversifying defense-related cys proteases of tomato. *Plant Cell* 20:1169-1183.
- 1334 Shi, J., Blundell, T.L., and Mizuguchi, K. 2001. FUGUE: sequence-structure homology  
1335 recognition using environment-specific substitution tables and structure-dependent  
1336 gap penalties. *J. Mol. Biol.* 310:243-257.
- 1337 Sievers, F., Wilm, A., Dineen, D., Gibson, T.J., Karplus, K., Li, W., Lopez, R., McWilliam,  
1338 H., Remmert, M., Söding, J., Thompson, J.D., and Higgins, D.G. 2011. Fast, scalable  
1339 generation of high-quality protein multiple sequence alignments using Clustal Omega.  
1340 *Mol. Syst. Biol.* 7: 539.
- 1341 Smith, T.J., and Shah, D.M. (2015). Kp6 antifungal protein-induced fungal resistance in food  
1342 crops. U.S. Patent Application No. 14/850,455.
- 1343 Söding, J., Biegert, A., and Lupas, A.N. 2005. The HHpred interactive server for protein  
1344 homology detection and structure prediction. *Nucleic Acids Res.* 33:W244-248.



- 1345 Sooriyaarachchi, S., Jaber, E., Covarrubias, A.S., Ubhayasekera, W., Asiegbu, F.O., and  
1346 Mowbray, S.L. 2011. Expression and  $\beta$ -glucan binding properties of Scots pine (*Pinus*  
1347 *sylvestris* L.) antimicrobial protein (Sp-AMP). *Plant Mol. Biol.* 77:33-45.
- 1348 Spanu, P. 1997. HCF-1, a hydrophobin from the tomato pathogen *Cladosporium fulvum*.  
1349 *Gene* 193:89-96.
- 1350 Srivastava, S.S., Mishra, A., Krishnan, B., and Sharma, Y. 2014.  $Ca^{2+}$ -binding motif of  $\beta\gamma$ -  
1351 crystallins. *J. Biol. Chem.* 289:10958-10966.
- 1352 Steinlauf, R., Peery, T., Koltin, Y., and Bruenn, J. 1988. The *Ustilago maydis* virus-encoded  
1353 toxin—Effect of KP6 on sensitive cells and spheroplasts. *Exp. Mycol.* 12:264-274.
- 1354 Stephens, C., Kazan, K., Goulter, K.C., Maclean, D.J., and Manners, J.M. 2005. The mode of  
1355 action of the plant antimicrobial peptide MiAMP1 differs from that of its structural  
1356 homologue, the yeast killer toxin WmKT. *FEMS Microbiol. Lett.* 243:205-210.
- 1357 Stergiopoulos, I., de Kock, M.J.D., Lindhout, P., and de Wit, P.J.G.M. 2007. Allelic variation  
1358 in the effector genes of the tomato pathogen *Cladosporium fulvum* reveals different  
1359 modes of adaptive evolution. *Mol. Plant Microbe Interact.* 20:1271-1283.
- 1360 Stergiopoulos, I., Kourmpetis, Y.A.I., Slot, J.C., Bakker, F.T., de Wit, P.J.G.M., and Rokas,  
1361 A. 2012. *In silico* characterization and molecular evolutionary analysis of a novel  
1362 superfamily of fungal effector proteins. *Mol. Biol. Evol.* 29:3371-3384.
- 1363 Stergiopoulos, I., van den Burg, H.A., Ökmen, B., Beenen, H.G., van Liere, S., Kema, G.H.J.,  
1364 and de Wit, P.J.G.M. 2010. Tomato Cf resistance proteins mediate recognition of  
1365 cognate homologous effectors from fungi pathogenic on dicots and monocots. *Proc.*  
1366 *Natl. Acad. Sci.* 107:7610-7615.
- 1367 Sunde, M., Pham, C.L., and Kwan, A.H. 2017. Molecular characteristics and biological  
1368 functions of surface-active and surfactant proteins. *Annu. Rev. Biochem.* 86. DOI:  
1369 10.1146/annurev-biochem-061516-044847.
- 1370 Szeto, C.Y., Leung, G.S., and Kwan, H.S. 2007. Le.MAPK and its interacting partner,  
1371 Le.DRMIP, in fruiting body development in *Lentinula edodes*. *Gene* 393:87-93.
- 1372 Takken, F.L., Luderer, R., Gabriels, S.H., Westerink, N., Lu, R., de Wit, P.J., and Joosten,  
1373 M.H. 2000. A functional cloning strategy, based on a binary PVX-expression vector,  
1374 to isolate HR-inducing cDNAs of plant pathogens. *Plant J.* 24:275-283.
- 1375 Takken, F.L.W., Thomas, C.M., Joosten, M.H.A.J., Golstein, C., Westerink, N., Hille, J.,  
1376 Nijkamp, H.J.J., de Wit, P.J.G.M., and Jones, J.D.G. 1999. A second gene at the  
1377 tomato *Cf-4* locus confers resistance to *Cladosporium fulvum* through recognition of a  
1378 novel avirulence determinant. *Plant J.* 20:279-288.

- 1379 Talbot, N.J., Ebbole, D.J., and Hamer, J.E. 1993. Identification and characterization of  
1380 *MPGI*, a gene involved in pathogenicity from the rice blast fungus *Magnaporthe*  
1381 *grisea*. Plant Cell 5:1575-1590.
- 1382 Talbot, N.J., Kershaw, M.J., Wakley, G.E., De Vries, O.M., Wessels, J.G., and Hamer, J.E.  
1383 1996. *MPGI* encodes a fungal hydrophobin involved in surface interactions during  
1384 infection-related development of *Magnaporthe grisea*. Plant Cell 8:985-999.
- 1385 Tao, J., Ginsberg, I., Banerjee, N., Held, W., Koltin, Y., and Bruenn, J. 1990. *Ustilago*  
1386 *maydis* KP6 killer toxin: structure, expression in *Saccharomyces cerevisiae*, and  
1387 relationship to other cellular toxins. Mol. Cell. Biol. 10:1373-1381.
- 1388 Thomas, C.M., Jones, D.A., Parniske, M., Harrison, K., Balint-Kurti, P.J., Hatzixanthis, K.,  
1389 and Jones, J.D. 1997. Characterization of the tomato *Cf-4* gene for resistance to  
1390 *Cladosporium fulvum* identifies sequences that determine recognitional specificity in  
1391 *Cf-4* and *Cf-9*. Plant Cell 9:2209-2224.
- 1392 Thomma, B.P., Nurnberger, T., and Joosten, M.H. 2011. Of PAMPs and effectors: the blurred  
1393 PTI-ETI dichotomy. Plant Cell 23:4-15.
- 1394 Thomma, B.P.H.J., van Esse, H.P., Crous, P.W., and de Wit, P.J.G.M. 2005. *Cladosporium*  
1395 *fulvum* (syn. *Passalora fulva*), a highly specialized plant pathogen as a model for  
1396 functional studies on plant pathogenic Mycosphaerellaceae. Mol. Plant Pathol. 6:379-  
1397 393.
- 1398 Tigchelaar, E.C. 1984. Collections of isogenic tomato stocks. Rep. Tomato Genet. Coop.  
1399 34:55-57.
- 1400 Tomato Genome Consortium. 2012. The tomato genome sequence provides insights into  
1401 fleshy fruit evolution. Nature 485:635-641.
- 1402 Trapnell, C., Williams, B.A., Pertea, G., Mortazavi, A., Kwan, G., van Baren, M.J., Salzberg,  
1403 S.L., Wold, B.J., and Pachter, L. 2010. Transcript assembly and quantification by  
1404 RNA-Seq reveals unannotated transcripts and isoform switching during cell  
1405 differentiation. Nat. Biotechnol. 28:511-515.
- 1406 van de Wouw, A.P., Lowe, R.G., Elliott, C.E., Dubois, D.J., and Howlett, B.J. 2014. An  
1407 avirulence gene, *AvrLmJ1*, from the blackleg fungus, *Leptosphaeria maculans*,  
1408 confers avirulence to *Brassica juncea* cultivars. Mol. Plant Pathol. 15:523-530.
- 1409 van den Ackerveken, G.F., van Kan, J.A., Joosten, M.H., Muisers, J.M., Verbakel, H.M., and  
1410 de Wit, P.J. 1993. Characterization of two putative pathogenicity genes of the fungal  
1411 tomato pathogen *Cladosporium fulvum*. Mol. Plant Microbe Interact. 6:210-215.

- 1412 van den Burg, H.A., Harrison, S.J., Joosten, M.H., Vervoort, J., and de Wit, P.J. 2006.  
1413 *Cladosporium fulvum* Avr4 protects fungal cell walls against hydrolysis by plant  
1414 chitinases accumulating during infection. *Mol. Plant Microbe Interact.* 19:1420-1430.
- 1415 van den Burg, H.A., Spronk, C.A., Boeren, S., Kennedy, M.A., Vissers, J.P., Vuister, G.W.,  
1416 de Wit, P.J., and Vervoort, J. 2004. Binding of the AVR4 elicitor of *Cladosporium*  
1417 *fulvum* to chitotriose units is facilitated by positive allosteric protein-protein  
1418 interactions: the chitin-binding site of AVR4 represents a novel binding site on the  
1419 folding scaffold shared between the invertebrate and the plant chitin-binding domain.  
1420 *J. Biol. Chem.* 279:16786-16796.
- 1421 van den Burg, H.A., Westerink, N., Francoijs, K.J., Roth, R., Woestenenk, E., Boeren, S., de  
1422 Wit, P.J., Joosten, M.H., and Vervoort, J. 2003. Natural disulfide bond-disrupted  
1423 mutants of AVR4 of the tomato pathogen *Cladosporium fulvum* are sensitive to  
1424 proteolysis, circumvent *Cf-4*-mediated resistance, but retain their chitin binding  
1425 ability. *J. Biol. Chem.* 278:27340-27346.
- 1426 van den Hooven, H.W., van den Burg, H.A., Vossen, P., Boeren, S., de Wit, P.J., and  
1427 Vervoort, J. 2001. Disulfide bond structure of the AVR9 elicitor of the fungal tomato  
1428 pathogen *Cladosporium fulvum*: evidence for a cystine knot. *Biochemistry* 40:3458-  
1429 3466.
- 1430 van der Hoorn, R.A., Roth, R., and de Wit, P.J. 2001a. Identification of distinct specificity  
1431 determinants in resistance protein Cf-4 allows construction of a Cf-9 mutant that  
1432 confers recognition of avirulence protein Avr4. *Plant Cell* 13:273-285.
- 1433 van der Hoorn, R.A., Kruijt, M., Roth, R., Brandwagt, B.F., Joosten, M.H., and de Wit, P.J.  
1434 2001b. Intragenic recombination generated two distinct *Cf* genes that mediate AVR9  
1435 recognition in the natural population of *Lycopersicon pimpinellifolium*. *Proc. Natl.*  
1436 *Acad. Sci.* 98:10493-10498.
- 1437 van Esse, H.P., Bolton, M.D., Stergiopoulos, I., de Wit, P.J., and Thomma, B.P. 2007. The  
1438 chitin-binding *Cladosporium fulvum* effector protein Avr4 is a virulence factor. *Mol.*  
1439 *Plant Microbe Interact.* 20:1092-1101.
- 1440 van Esse, H.P., van't Klooster, J.W., Bolton, M.D., Yadeta, K.A., van Baarlen, P., Boeren, S.,  
1441 Vervoort, J., de Wit, P.J., and Thomma, B.P. 2008. The *Cladosporium fulvum*  
1442 virulence protein Avr2 inhibits host proteases required for basal defense. *Plant Cell*  
1443 20:1948-1963.

- 1444 van Kan, J.A., van den Ackerveken, G.F., and de Wit, P.J. 1991. Cloning and characterization  
1445 of cDNA of avirulence gene *avr9* of the fungal pathogen *Cladosporium fulvum*,  
1446 causal agent of tomato leaf mold. *Mol. Plant Microbe Interact.* 4:52-59.
- 1447 Vleeshouwers, V.G.A.A., and Oliver, R.P. 2014. Effectors as tools in disease resistance  
1448 breeding against biotrophic, hemibiotrophic, and necrotrophic plant pathogens. *Mol.*  
1449 *Plant Microbe Interact.* 27:196-206.
- 1450 Vleeshouwers, V.G.A.A., Rietman, H., Krenek, P., Champouret, N., Young, C., Oh, S.-K.,  
1451 Wang, M., Bouwmeester, K., Vosman, B., Visser, R.G.F., Jacobsen, E., Govers, F.,  
1452 Kamoun, S., and van der Vossen, E.A.G. 2008. Effector genomics accelerates  
1453 discovery and functional profiling of potato disease resistance and *Phytophthora*  
1454 *infestans* avirulence genes. *PloS one* 3:e2875.
- 1455 Webb, B., and Sali, A. 2002. Comparative protein structure modeling using MODELLER. In:  
1456 *Current Protocols in Bioinformatics*, John Wiley & Sons, Inc.
- 1457 Wessels, J. 1994. Developmental regulation of fungal cell wall formation. *Annu. Rev.*  
1458 *Phytopathol.* 32:413-437.
- 1459 Westerink, N., Brandwagt, B.F., de Wit, P.J.G.M., and Joosten, M.H.A.J. 2004.  
1460 *Cladosporium fulvum* circumvents the second functional resistance gene homologue  
1461 at the *Cf-4* locus (*Hcr9-4E*) by secretion of a stable *avr4E* isoform. *Mol. Microbiol.*  
1462 54:533-545.
- 1463 Whiteford, J.R., and Spanu, P.D. 2001. The hydrophobin Hcf-1 of *Cladosporium fulvum* is  
1464 required for efficient water-mediated dispersal of conidia. *Fungal Genet. Biol.*  
1465 32:159-168.
- 1466 Wistow, G., Turnell, B., Summers, L., Slingsby, C., Moss, D., Miller, L., Lindley, P., and  
1467 Blundell, T. 1983. X-ray analysis of the eye lens protein  $\gamma$ -II crystallin at 1.9 Å  
1468 resolution. *J. Mol. Biol.* 170:175-202.
- 1469 Wösten, H.A., van Wetter, M.-A., Lugones, L.G., van der Mei, H.C., Busscher, H.J., and  
1470 Wessels, J.G. 1999. How a fungus escapes the water to grow into the air. *Curr. Biol.*  
1471 9:85-88.
- 1472 Wu, S., and Zhang, Y. 2008. MUSTER: Improving protein sequence profile-profile  
1473 alignments by using multiple sources of structure information. *Proteins: Struct.,*  
1474 *Funct., Bioinf.* 72:547-556.
- 1475 Wulff, B.B., Thomas, C.M., Smoker, M., Grant, M., and Jones, J.D. 2001. Domain swapping  
1476 and gene shuffling identify sequences required for induction of an Avr-dependent  
1477 hypersensitive response by the tomato Cf-4 and Cf-9 proteins. *Plant Cell* 13:255-272.

- 1478 Wulff, B.B., Heese, A., Tomlinson-Buhot, L., Jones, D.A., de la Pena, M., and Jones, J.D.  
1479 2009a. The major specificity-determining amino acids of the tomato Cf-9 disease  
1480 resistance protein are at hypervariable solvent-exposed positions in the central  
1481 leucine-rich repeats. *Mol. Plant Microbe Interact.* 22:1203-1213.
- 1482 Wulff, B.B.H., Chakrabarti, A., and Jones, D.A. 2009b. Recognition specificity and  
1483 evolution in the tomato–*Cladosporium fulvum* pathosystem. *Mol. Plant Microbe*  
1484 *Interact.* 22:1191-1202.
- 1485 Xu, D., Jaroszewski, L., Li, Z., and Godzik, A. 2013. FFAS-3D: improving fold recognition  
1486 by including optimized structural features and template re-ranking. *Bioinformatics.*
- 1487 Yang, Y., Faraggi, E., Zhao, H., and Zhou, Y. 2011. Improving protein fold recognition and  
1488 template-based modeling by employing probabilistic-based matching between  
1489 predicted one-dimensional structural properties of query and corresponding native  
1490 properties of templates. *Bioinformatics* 27:2076-2082.
- 1491 Zhang, Y. 2008. I-TASSER server for protein 3D structure prediction. *BMC Bioinformatics*  
1492 9:40.

1493

#### 1494 **AUTHOR-RECOMMENDED INTERNET RESOURCES**

- 1495 Big-PI Fungal Predictor server: [http://mendel.imp.ac.at/gpi/fungi\\_server.html](http://mendel.imp.ac.at/gpi/fungi_server.html)  
1496 Clustal Omega server: <https://www.ebi.ac.uk/Tools/msa/clustalo/>  
1497 FFAS03/FFAS-3D server: <http://ffas.sanfordburnham.org/ffas-cgi/cgi/ffas.pl>  
1498 FUGUE v2.0 server: <http://mizuguchilab.org/fugue/prfsearch.html>  
1499 HHPred server: <https://toolkit.tuebingen.mpg.de/hhpred/>  
1500 I-TASSER server: <http://zhanglab.ccmb.med.umich.edu/I-TASSER/>  
1501 JGI BLAST server: <http://genome.jgi.doe.gov/pages/blast-query.jsf?db=fungi>  
1502 MEME v4.11.2 server: <http://meme-suite.org/tools/meme>  
1503 MUSTER server: <http://zhanglab.ccmb.med.umich.edu/MUSTER/>  
1504 NCBI BLAST server: <https://blast.ncbi.nlm.nih.gov/Blast.cgi>  
1505 pGenTHREADER server: <http://bioinf.cs.ucl.ac.uk/psipred/>  
1506 Phyre2 server: <http://www.sbg.bio.ic.ac.uk/phyre2/html/page.cgi?id=index>  
1507 RaptorX server: <http://raptorx.uchicago.edu/StructurePrediction/predict/>  
1508 RCSB PDB: <http://www.rcsb.org/pdb/home/home.do>  
1509 SignalP v3.0 server: <http://www.cbs.dtu.dk/services/SignalP-3.0/>  
1510 SignalP v4.1 server: <http://www.cbs.dtu.dk/services/SignalP/>  
1511 SPARKS-X server: <http://sparks-lab.org/yueyang/server/SPARKS-X/>

1512 TMHMM v2.0 server: <http://www.cbs.dtu.dk/services/TMHMM/>

1513

1514

1515

1516

1517

1518

1519

1520

1521

1522

1523

1524

1525

1526

1527

1528

1529

1530

1531

1532

1533

1534

1535

1536

1537

1538

1539

1540

1541

1542

1543

1544

1545

1546 **TABLE**

1547 **Table 1.** Apoplastic *in planta*-induced small secreted proteins (ipiSSPs) of *Cladosporium*  
 1548 *fulvum* produced during colonization of susceptible tomato (*Solanum lycopersicum* cv.  
 1549 Heinz-Cf-0).

| <b>ipiSSP name<sup>1</sup></b> | <b>GenBank accession number</b> | <b>Protein length (aa)<sup>2</sup></b> | <b>No. cysteine residues<sup>3</sup></b> | <b>Brief description and functional domains<sup>4</sup></b>                                                                                                                 |
|--------------------------------|---------------------------------|----------------------------------------|------------------------------------------|-----------------------------------------------------------------------------------------------------------------------------------------------------------------------------|
| Avr2                           | CAD16675                        | 78                                     | 8                                        | IP effector recognized by the Cf-2 immune receptor. Cysteine protease inhibitor. Similar to hypothetical proteins                                                           |
| Avr4                           | CAA55403                        | 135                                    | 8                                        | IP effector recognized by the Cf-4 immune receptor. Protector of cell wall chitin. CBM_14 domain (PF01607)                                                                  |
| Avr4E                          | AAT28196                        | 121                                    | 6                                        | IP effector recognized by the Cf-4E immune receptor. Novel                                                                                                                  |
| Avr5                           | AHY02126                        | 103                                    | 10                                       | IP effector recognized by the Cf-5 immune receptor. Novel                                                                                                                   |
| Avr9                           | P22287                          | 63                                     | 6                                        | IP effector recognized by the Cf-9 immune receptor. Cysteine knot fold. Similar to hypothetical proteins. Homolog of CfCE67                                                 |
| Ecp1                           | CAA78400                        | 96                                     | 8                                        | IP effector recognized by the Cf-Ecp1 immune receptor. Similar to hypothetical proteins                                                                                     |
| Ecp2-1                         | CAA78401                        | 165                                    | 4                                        | IP effector recognized by the Cf-Ecp2 immune receptor. Hce2 domain (PF14856)                                                                                                |
| Ecp4                           | CAC01609                        | 119                                    | 6                                        | IP effector recognized by the Cf-Ecp4 immune receptor. Predicted $\beta/\gamma$ -crystallin-like fold. Similar to hypothetical proteins. Paralog of Ecp7. Homolog of CfCE72 |
| Ecp5                           | CAC01610                        | 115                                    | 6                                        | IP effector recognized by the Cf-Ecp5 immune receptor. Similar to hypothetical                                                                                              |

| proteins           |          |     |    |                                                                                                                           |
|--------------------|----------|-----|----|---------------------------------------------------------------------------------------------------------------------------|
| Ecp6               | AQA29283 | 222 | 8  | IP effector recognized by the Cf-Ecp6 immune receptor. Suppresses chitin-triggered immunity. Three LysM domains (PF01476) |
| Ecp7               | AQA29284 | 116 | 6  | Predicted $\beta/\gamma$ -crystallin-like fold. Similar to hypothetical proteins. Paralog of Ecp4. Homolog of CfCE72      |
| Ecp8/<br>CfCE6     | AQA29209 | 105 | 8  | Possible IP effector. Novel                                                                                               |
| Ecp9-1/<br>CfCE9   | AQA29212 | 88  | 6  | Possible IP effector. Similar to hypothetical proteins. Paralog of Ecp9-9/CfCE49                                          |
| Ecp9-9/<br>CfCE49  | AQA29252 | 90  | 6  | Similar to hypothetical proteins. Paralog of Ecp9-1/CfCE9                                                                 |
| Ecp10-1/<br>CfCE14 | AQA29217 | 70  | 6  | Possible IP effector. Similar to hypothetical proteins. Paralog of Ecp10-2/CfCE31                                         |
| Ecp10-2/<br>CfCE31 | AQA29234 | 67  | 6  | Similar to hypothetical proteins. Paralog of Ecp10-1/CfCE14                                                               |
| Ecp11-1/<br>CfCE18 | AQA29221 | 165 | 10 | Possible IP effector. Homolog of the AvrLm3 and AvrLmJ1 IP effectors from <i>Leptosphaeria maculans</i>                   |
| Ecp12/<br>CfCE26   | AQA29229 | 133 | 8  | Possible IP effector. Similar to hypothetical proteins                                                                    |
| Ecp13/<br>CfCE33   | AQA29236 | 73  | 10 | Possible IP effector. Similar to hypothetical proteins                                                                    |
| Ecp14-1/<br>CfCE55 | AQA29258 | 206 | 12 | Possible IP effector. Class II hydrophobin                                                                                |
| Ecp15/<br>CfCE59   | AQA29262 | 131 | 8  | Possible IP effector. Similar to hypothetical proteins                                                                    |
| Ecp16/<br>CfCE48   | AQA29251 | 101 | 8  | Possible IP effector. Novel                                                                                               |



|                     |          |     |    |                                                                                                            |
|---------------------|----------|-----|----|------------------------------------------------------------------------------------------------------------|
| Ecp17/<br>CfCE19    | AQA29222 | 62  | 6  | Possible IP effector. Novel                                                                                |
| CfPhiA-1/<br>CfCE11 | AQA29214 | 195 | 4  | Phialide protein. Paralog of<br>CfPhiA-2/CfCE53                                                            |
| CfPhiA-2/<br>CfCE53 | AQA29256 | 218 | 6  | Phialide protein. Paralog of<br>CfPhiA-1/CfCE11                                                            |
| CfCE3               | AQA29206 | 81  | 10 | Novel                                                                                                      |
| CfCE4               | AQA29207 | 162 | 8  | Similar to hypothetical proteins. Paralog<br>of CfCE16                                                     |
| CfCE5               | AQA29208 | 166 | 4  | Predicted Alt a 1 allergen-like fold.<br>Similar to hypothetical proteins. Paralog<br>of CfCE25 and CfCE65 |
| CfCE7               | AQA29210 | 184 | 8  | Similar to hypothetical proteins                                                                           |
| CfCE8               | AQA29211 | 161 | 8  | Similar to hypothetical proteins                                                                           |
| CfCE12              | AQA29215 | 91  | 4  | Novel                                                                                                      |
| CfCE13              | AQA29216 | 92  | 4  | Homolog of CfCE63. Novel                                                                                   |
| CfCE15              | AQA29218 | 79  | 8  | Similar to hypothetical proteins                                                                           |
| CfCE16              | AQA29219 | 130 | 8  | Similar to hypothetical proteins. Paralog<br>of CfCE4                                                      |
| CfCE20              | AQA29223 | 65  | 6  | Similar to hypothetical protein                                                                            |
| CfCE22              | AQA29225 | 67  | 4  | Similar to hypothetical proteins                                                                           |
| CfCE24              | AQA29227 | 101 | 6  | Predicted KP6-like fold. Similar to<br>hypothetical proteins. Homolog of<br>CfCE56, CfCE58 and CfCE72      |
| CfCE25              | AQA29228 | 149 | 4  | Predicted Alt a 1 allergen-like fold.<br>Similar to hypothetical proteins. Paralog<br>of CfCE5 and CfCE65  |
| CfCE27              | AQA29230 | 93  | 10 | Novel                                                                                                      |
| CfCE30              | AQA29233 | 197 | 4  | IgE-binding protein. Paralog of CfCE70                                                                     |
| CfCE34              | AQA29237 | 210 | 8  | Similar to hypothetical proteins                                                                           |
| CfCE35              | AQA29238 | 92  | 8  | Novel                                                                                                      |
| CfCE36              | AQA29239 | 70  | 8  | Novel                                                                                                      |
| CfCE37              | AQA29240 | 73  | 10 | Similar to hypothetical proteins                                                                           |

|        |          |     |    |                                                                                                            |
|--------|----------|-----|----|------------------------------------------------------------------------------------------------------------|
| CfCE40 | AQA29243 | 79  | 6  | Novel                                                                                                      |
| CfCE41 | AQA29244 | 84  | 10 | Novel                                                                                                      |
| CfCE42 | AQA29245 | 63  | 8  | Similar to hypothetical proteins                                                                           |
| CfCE44 | AQA29247 | 141 | 6  | Predicted $\beta/\gamma$ -crystallin-like fold. Similar to hypothetical proteins                           |
| CfCE47 | AQA29250 | 92  | 8  | Similar to hypothetical proteins                                                                           |
| CfCE50 | AQA29253 | 133 | 9  | Similar to hypothetical proteins                                                                           |
| CfCE51 | AQA29254 | 128 | 14 | Similar to hypothetical proteins                                                                           |
| CfCE56 | AQA29259 | 105 | 8  | Predicted KP6-like fold. Similar to hypothetical proteins. Paralog of CfCE58. Homolog of CfCE24 and CfCE72 |
| CfCE57 | AQA29260 | 94  | 10 | Similar to hypothetical proteins                                                                           |
| CfCE58 | AQA29261 | 105 | 8  | Predicted KP6-like fold. Similar to hypothetical proteins. Paralog of CfCE56. Homolog of CfCE24 and CfCE72 |
| CfCE60 | AQA29263 | 146 | 4  | Similar to hypothetical proteins. GPI-anchored domain (PF10342)                                            |
| CfCE61 | AQA29264 | 146 | 4  | Cerato-platanin. Cerato-platanin domain (PF07249)                                                          |
| CfCE63 | AQA29265 | 77  | 1  | Homolog of CfCE13. Novel                                                                                   |
| CfCE64 | AQA29266 | 164 | 2  | Similar to hypothetical proteins                                                                           |
| CfCE65 | AQA29267 | 153 | 4  | Predicted Alt a 1 allergen-like fold. Similar to hypothetical proteins. Paralog of CfCE5 and CfCE25        |
| CfCE66 | AQA29268 | 148 | 10 | Similar to hypothetical proteins                                                                           |
| CfCE67 | AQA29269 | 78  | 8  | Similar to hypothetical proteins. Homolog of Avr9                                                          |
| CfCE68 | AQA29270 | 104 | 7  | Similar to hypothetical proteins                                                                           |
| CfCE69 | AQA29271 | 182 | 0  | Hydrophobic surface-binding protein. HsbA domain (PF12296)                                                 |
| CfCE70 | AQA29272 | 195 | 2  | IgE-binding protein. Paralog of CfCE30                                                                     |
| CfCE71 | AQA29273 | 238 | 8  | Similar to hypothetical proteins                                                                           |
| CfCE72 | AQA29274 | 266 | 14 | Amino (N)-terminal domain has a                                                                            |

---

predicted KP6-like fold. Carboxyl (C)-terminal domain has a predicted  $\beta/\gamma$ -crystallin-like fold. Similar to hypothetical proteins. Homolog of Ecp4, Ecp7, CfCE24, CfCE56 and CfCE58

|        |          |     |    |                                  |
|--------|----------|-----|----|----------------------------------|
| CfCE73 | AQA29275 | 170 | 4  | Similar to hypothetical proteins |
| CfCE74 | AQA29276 | 176 | 2  | Similar to hypothetical proteins |
| CfCE76 | AQA29278 | 160 | 11 | Similar to hypothetical proteins |
| CfCE77 | AQA29279 | 239 | 20 | Similar to hypothetical proteins |

---

1550 <sup>1</sup>Ecp, Extracellular protein; CfCE, *C. fulvum* Candidate Effector.

1551 <sup>2</sup>aa, amino acids.

1552 <sup>3</sup>Number of cysteine residues in each mature ipiSSP (i.e. following their predicted N-terminal  
1553 signal peptide cleavage site).

1554 <sup>4</sup>IP, Invasion Pattern.

1555

1556

1557

1558

1559

1560

1561

1562

1563

1564

1565

1566

1567

1568

1569

1570

1571

1572

1573

1574 **FIGURES**

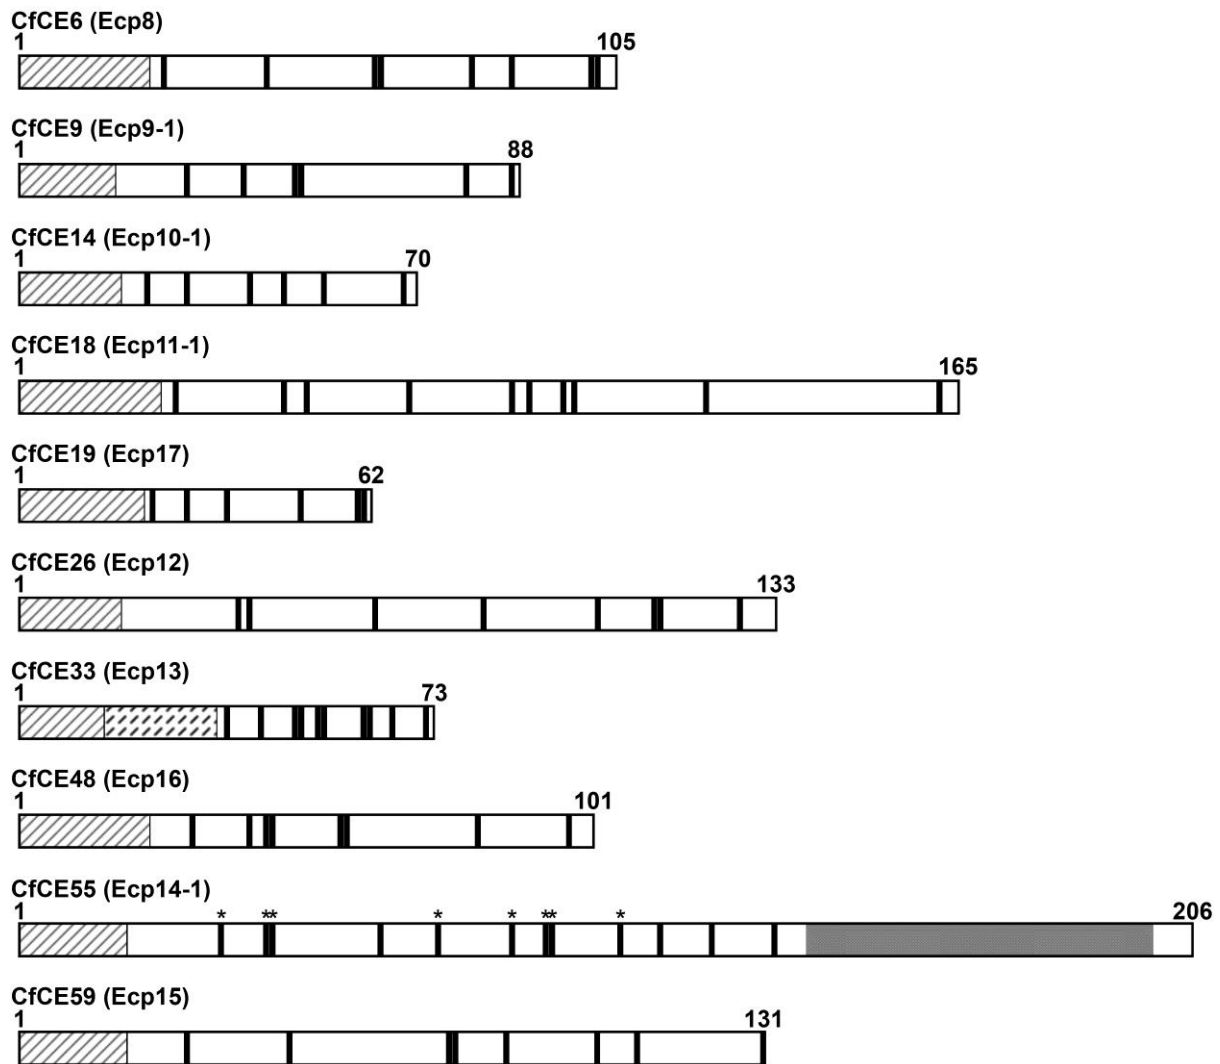

1575  
1576 **Fig. 1.** Schematic representation of 10 apoplastic *Cladosporium fulvum* strain 0WU candidate  
1577 effector (CfCE) proteins that trigger a hypersensitive response (HR) in one or more specific  
1578 accessions of tomato. All 10 CfCE proteins are small, cysteine-rich, and are predicted to  
1579 possess an amino (N)-terminal signal peptide for extracellular targeting to the tomato leaf  
1580 apoplast. The predicted signal peptide of each CfCE protein is shown by black diagonal lines.  
1581 Cysteine residues are shown by thick vertical bars. Numbers indicate the first and last amino  
1582 acid residue of each protein. The predicted propeptide domain of CfCE33, ending with a  
1583 predicted kexin protease cleavage site, is shown by black dashed diagonal lines. A  
1584 glycine/leucine-rich region present in CfCE55 is shaded grey. Cysteine residues of CfCE55  
1585 that are conserved with fungal hydrophobin proteins are shown by asterisks.

1586

1587

1588

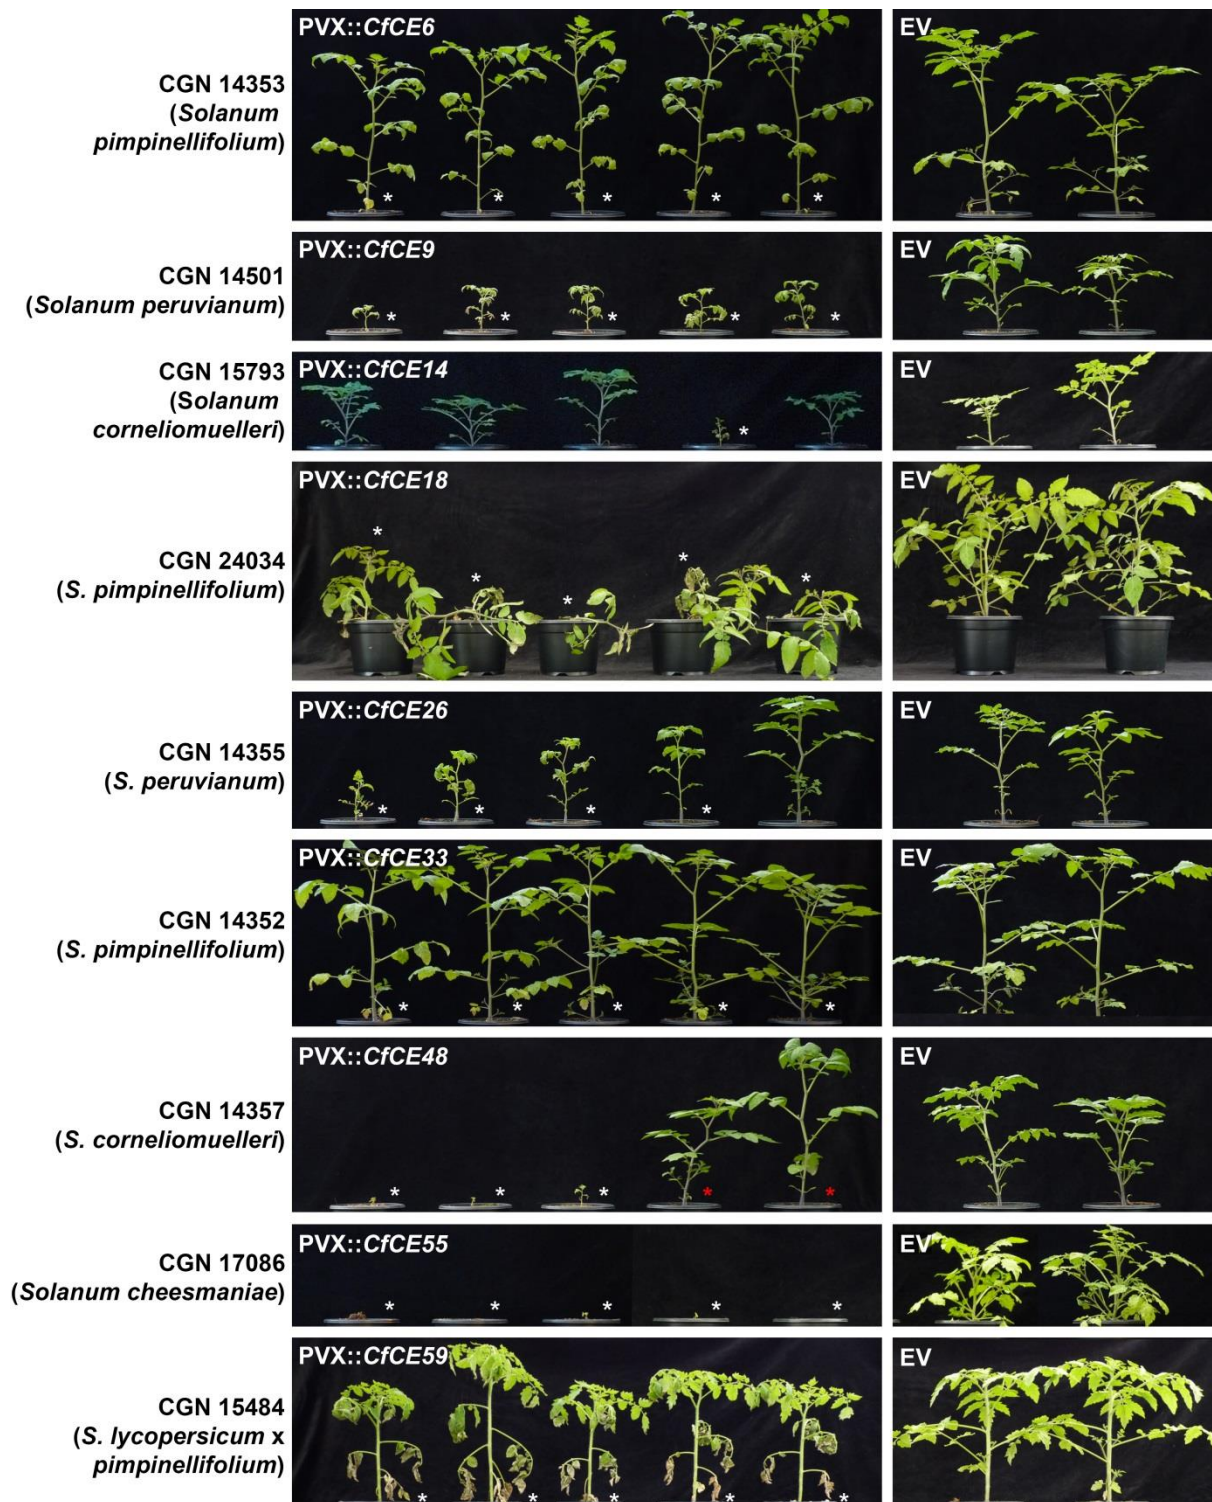

1589

1590 **Fig. 2.** Nine *Cladosporium fulvum* candidate effectors (CfCEs) of strain 0WU trigger a  
1591 systemic hypersensitive response (HR) in one or more specific accessions of tomato. Selected  
1592 examples are shown. CfCEs were systemically produced in five representatives of each  
1593 tomato accession (left) using the *Potato virus X* (PVX) transient expression system.  
1594 Recombinant PVX was delivered by *Agrobacterium tumefaciens* (agroinfection) through  
1595 cotyledon infiltration at 10 d post-seed germination. Two representatives of each tomato

1596 accession were inoculated with PVX alone (pSfinx empty vector; EV) (right). Plants  
1597 exhibiting a systemic chlorotic or necrotic HR are shown by white asterisks. Plants without  
1598 obvious mosaic symptoms (i.e. not infected with PVX) are shown by red asterisks.  
1599 Photographs were taken at 21 d post-infiltration.

1600  
1601  
1602  
1603  
1604  
1605  
1606  
1607  
1608  
1609  
1610  
1611  
1612  
1613  
1614  
1615  
1616  
1617  
1618  
1619  
1620  
1621  
1622  
1623  
1624  
1625  
1626  
1627  
1628  
1629

```

Ecp11-1_AQA29221_Clafu MLSSAKTLWLLLLSMLAYTTKPAYSLDCKAVALKVVHQFRIPGGDNCNFYCSYDSLQQF 60
AvrLm3_ALS92799_Lepma MLKPTKVIQILFLLFTAF-FARTCALECHAVAFSSDHQFSLGRNEDCNLYCSKNMSLSIF 59
      * * : : * * : * : : * * : * * : * * : * * : * * : * * : *
Ecp11-1_AQA29221_Clafu N-LWKKNDACQQGADGFSTAIPKIQEAPCSD-CPGSKTCICSVQATAWRVRNG--KWFDGQ 116
AvrLm3_ALS92799_Lepma SRVLPLDDPCQGDDGFSSLTATIDQISCDTGCQ----CRCSVHATAWRVHKSGKRYSRRT 115
      : : * * * * * * : * : * * * * * * : * * * * * * : * :
Ecp11-1_AQA29221_Clafu QWFDCDVKPYTERVLGRRWYDESEADKDIYVGYYSRGFISNDNVHCGSQ 165
AvrLm3_ALS92799_Lepma GWVSCNLEDYVARITGRPFIPVNG----ALHEYFSRGFVSKDEVHCDHQ 160
      * * : : * * : * * : * * : * * : * * : * * : * * : *

```

1630

1631 **Fig. 3.** Ecp11-1 of *Cladosporium fulvum* is a homolog of AvrLm3 from *Leptosphaeria*  
1632 *maculans*. Conserved (\*) and physicochemically similar (:) amino acid residues shared  
1633 between Ecp11-1 and AvrLm3 are shown below the alignment. Cysteine residues are  
1634 highlighted in bold. The predicted amino (N)-terminal signal peptide sequence of Ecp11-1  
1635 and AvrLm3 is underlined.

1636

1637

1638

1639

1640

1641

1642

1643

1644

1645

1646

1647

1648

1649

1650

1651

1652

1653

1654

1655

1656

1657

1658

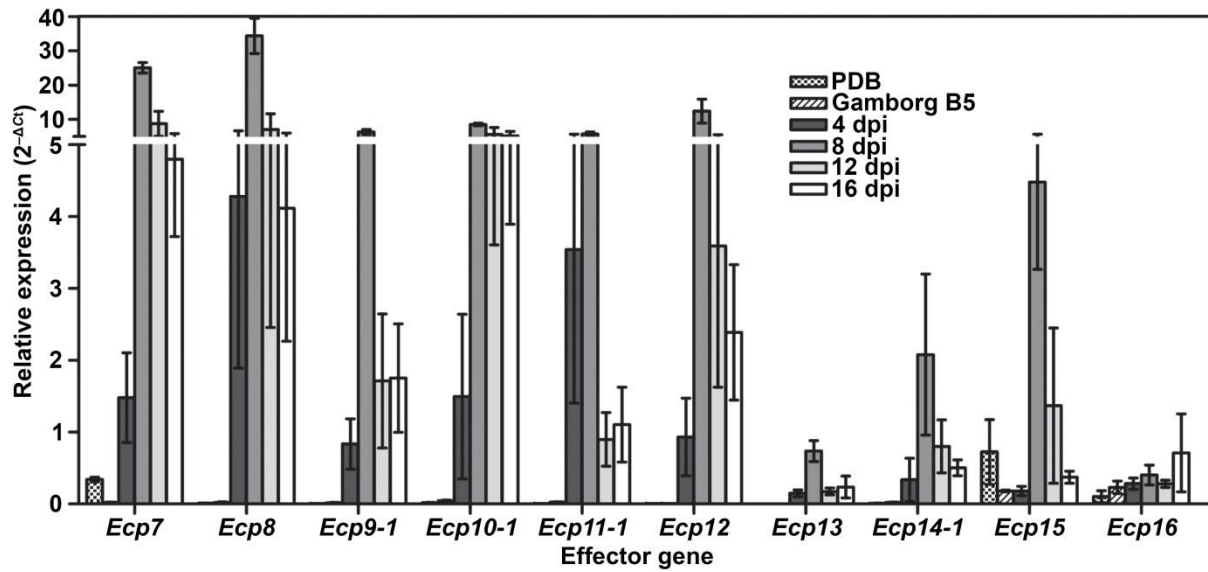

1659

1660 **Fig. 4.** Genes encoding a hypersensitive response (HR)-eliciting extracellular protein (Ecp)  
1661 from *Cladosporium fulvum* strain OWU are induced *in planta*. Expression was monitored by a  
1662 reverse-transcription–quantitative real-time polymerase chain reaction (RT-qrtPCR)  
1663 experiment *in planta* during a compatible *C. fulvum* strain OWU–*Solanum lycopersicum* cv.  
1664 Heinz Cf-0 interaction at 4, 8, 12 and 16 d post-inoculation (dpi), as well as during growth of  
1665 *C. fulvum* strain OWU *in vitro* in potato-dextrose broth (PDB) and Gamborg B5 liquid media  
1666 at 4 dpi. The *C. fulvum actin* gene was targeted for normalisation of expression, which was  
1667 calculated using the  $2^{-\Delta C_t}$  method. Error bars represent the standard deviation of three  
1668 biological replicates.

1669

1670

1671

1672

1673

1674

1675

1676

1677

1678

1679

1680

1681

1682



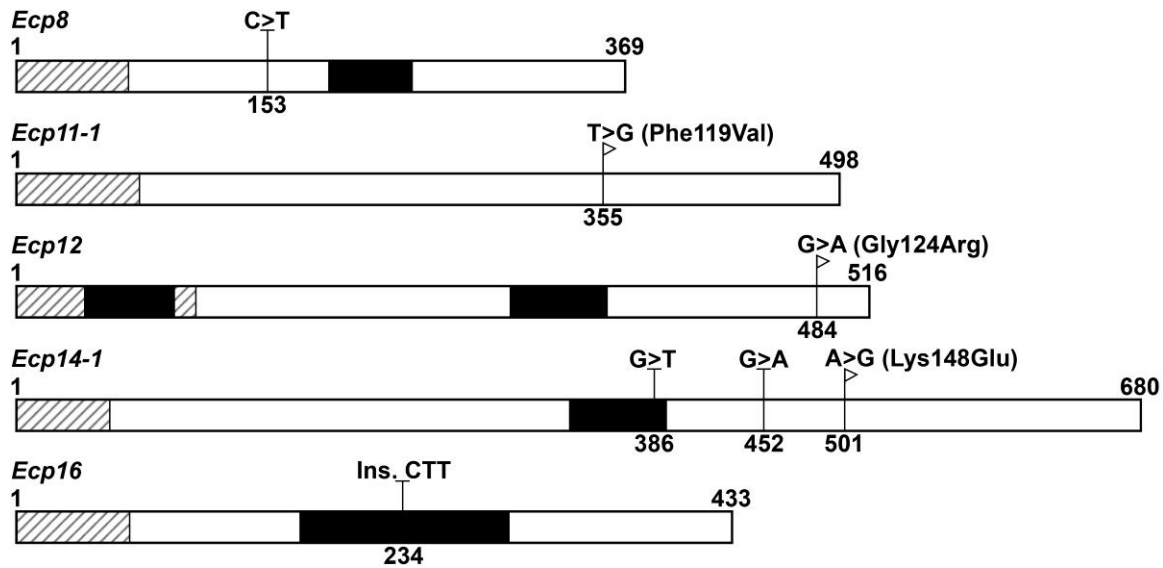

1683

1684 **Fig. 5.** Genes encoding a hypersensitive response (HR)-eliciting extracellular protein (Ecp)

1685 exhibit limited allelic variation between strains of *Cladosporium fulvum*. Allelic variation

1686 was assessed across 10 distinct strains of *C. fulvum*, and was compared to strain 0WU. Open

1687 reading frames (encoding each mature protein) and introns are shown as white and black

1688 boxes, respectively. Regions of each *Ecp* gene predicted to encode an amino (N)-terminal

1689 signal peptide sequence are shown by black diagonal lines. DNA modifications leading to

1690 non-synonymous amino acid substitutions are shown by white flags. DNA modifications

1691 leading to synonymous amino acid mutations or changes to intronic sequences are shown by

1692 Ts. Numbers above each schematic represent the first and last nucleotide of each gene (i.e. of

1693 the ATG to STOP codons, respectively). Numbers on the bottom of each schematic represent

1694 the location of each DNA modification.

1695

1696

1697

1698

1699

1700

1701

1702

1703

1704

1705

1706

1707 **GENBANK ACCESSION NUMBERS**

1708 *Ecp6*, KX943112; *Ecp7*, KX943113; *Ecp8/CfCE6*, KX943038; *Ecp9-1/CfCE9*, KX943041;  
1709 *Ecp9-2*, KX943114; *Ecp9-3*, KX943115; *Ecp9-4*, KX943116; *Ecp9-5*, KX943117; *Ecp9-6*,  
1710 KX943118; *Ecp9-7*, KX943119; *Ecp9-8*, KX943120; *Ecp9-9/CfCE49*, KX943081;  
1711 *Ecp10-1/CfCE14*, KX943046; *Ecp10-2/CfCE31*, KX943063; *Ecp10-3*, KX943121;  
1712 *Ecp11-1/CfCE18*, KX943050; *Ecp12/CfCE26*, KX943058; *Ecp13/CfCE33*, KX943065;  
1713 *Ecp14-1/CfCE55*, KX943087; *Ecp14-2*, KX943122; *Ecp15/CfCE59*, KX943091;  
1714 *Ecp16/CfCE48*, KX943080; *Ecp17/CfCE19*, KX943051; *CfPhiA-1/CfCE11*, KX943043;  
1715 *CfPhiA-2/CfCE53*, KX943085; *CfCE3*, KX943035; *CfCE4*, KX943036; *CfCE5*, KX943037;  
1716 *CfCE7*, KX943039; *CfCE8*, KX943040; *CfCE12*, KX943044; *CfCE13*, KX943045; *CfCE15*,  
1717 KX943047; *CfCE16*, KX943048; *CfCE20*, KX943052; *CfCE22*, KX943054; *CfCE24*,  
1718 KX943056; *CfCE25*, KX943057; *CfCE27*, KX943059; *CfCE30*, KX943062; *CfCE34*,  
1719 KX943066; *CfCE35*, KX943067; *CfCE36*, KX943068; *CfCE37*, KX943069; *CfCE40*,  
1720 KX943072; *CfCE41*, KX943073; *CfCE42*, KX943074; *CfCE44*, KX943076; *CfCE47*,  
1721 KX943079; *CfCE50*, KX943082; *CfCE51*, KX943083; *CfCE56*, KX943088; *CfCE57*,  
1722 KX943089; *CfCE58*, KX943090; *CfCE60*, KX943092; *CfCE61*, KX943093; *CfCE63*,  
1723 KX943094; *CfCE64*, KX943095; *CfCE65*, KX943096; *CfCE66*, KX943097; *CfCE67*,  
1724 KX943098; *CfCE68*, KX943099; *CfCE69*, KX943100; *CfCE70*, KX943101; *CfCE71*,  
1725 KX943102; *CfCE72*, KX943103; *CfCE73*, KX943104; *CfCE74*, KX943105; *CfCE76*,  
1726 KX943107; *CfCE77*, KX943108.
